# Supplementary material for: Have compensatory mutations facilitated the current epidemic of multidrug-resistant tuberculosis?
Source: PubMed Central journal article supplement (PMC5988693; doi:10.1038/s41426-018-0101-6), 2018-06-06
Supplement: 41426_2018_101_MOESM1_ESM.pdf [file 41426_2018_101_MOESM1_ESM.pdf]

**Supplementary Table 1. Data information of the Global dataset.**

| Continent     | Country      | Title of the original article                                                                                                                                                         | Total strain number | No. of MDR-TB strains | Cohort or population-based collection |
|---------------|--------------|---------------------------------------------------------------------------------------------------------------------------------------------------------------------------------------|---------------------|-----------------------|---------------------------------------|
| Europe        | UK           | <b>Whole-genome sequencing for prediction of Mycobacterium tuberculosis drug susceptibility and resistance: a retrospective cohort study.</b>                                         | 1859                | 90                    | 72                                    |
|               |              | Whole-genome sequencing for rapid susceptibility testing of M. tuberculosis.                                                                                                          |                     |                       |                                       |
|               |              | Whole-genome sequencing to delineate Mycobacterium tuberculosis outbreaks: a retrospective observational study.                                                                       |                     |                       |                                       |
|               |              | Clinical application of whole-genome sequencing to inform treatment for multidrug-resistant tuberculosis cases.                                                                       |                     |                       |                                       |
|               |              | Assessment of Mycobacterium tuberculosis transmission in Oxfordshire, UK, 2007-12, with whole pathogen genome sequences: an observational study.                                      |                     |                       |                                       |
| Europe        | Germany      | <b>Whole-genome sequencing for prediction of Mycobacterium tuberculosis drug susceptibility and resistance: a retrospective cohort study.</b>                                         | 814                 | 7                     | 7                                     |
|               |              | Whole-genome-based Mycobacterium tuberculosis surveillance: a standardized, portable, and expandable approach.                                                                        |                     |                       |                                       |
|               | Netherlands  | Inferring patient to patient transmission of Mycobacterium tuberculosis from whole genome sequencing data.                                                                            | 207                 | 2                     |                                       |
|               | Switzerland  | Tracking a tuberculosis outbreak over 21 years: strain-specific single-nucleotide polymorphism typing combined with targeted whole-genome sequencing.                                 | 74                  | 3                     |                                       |
|               | Russia       | Evolution and transmission of drug resistant tuberculosis in a Russian population                                                                                                     | 1285                | 546                   |                                       |
| Asia          | China        | Genome sequencing of 161 Mycobacterium tuberculosis isolates from China identifies genes and intergenic regions associated with drug resistance                                       | 283                 | 99                    |                                       |
|               | Uzbekistan   | <b>Whole-genome sequencing for prediction of Mycobacterium tuberculosis drug susceptibility and resistance: a retrospective cohort study.</b>                                         | 260                 | 237                   | 237                                   |
| North America | Canada       | Population genomics of Mycobacterium tuberculosis in the Inuit.                                                                                                                       | 221                 | 0                     |                                       |
|               |              | Marked microevolution of a unique Mycobacterium tuberculosis strain in 17 years of ongoing transmission in a high risk population.                                                    |                     |                       |                                       |
| Africa        | South-Africa | <b>Whole-genome sequencing for prediction of Mycobacterium tuberculosis drug susceptibility and resistance: a retrospective cohort study.</b>                                         | 1021                | 284                   | 276                                   |
|               |              | Whole genome sequencing reveals genomic heterogeneity and antibiotic purification in Mycobacterium tuberculosis isolates.                                                             |                     |                       |                                       |
|               |              | <b>Evolution of Extensively Drug-Resistant Tuberculosis over Four Decades: Whole Genome Sequencing and Dating Analysis of Mycobacterium tuberculosis Isolates from KwaZulu-Natal.</b> |                     |                       |                                       |

|              |                                                                                                                                               |      |    |    |
|--------------|-----------------------------------------------------------------------------------------------------------------------------------------------|------|----|----|
| Sierra Leone | <b>Whole-genome sequencing for prediction of Mycobacterium tuberculosis drug susceptibility and resistance: a retrospective cohort study.</b> | 70   | 10 | 10 |
| Malawi       | Large-scale whole genome sequencing of M. tuberculosis provides insights into transmission in a high prevalence area                          | 2268 | 33 |    |
| Mali         | Whole Genome Sequencing of Mycobacterium africanum Strains from Mali Provides Insights into the Mechanisms of Geographic Restriction          | 91   | 35 |    |

**Supplementary Table 2. Drug-resistant mutations that were used to identify MDR-TB strains in this study.**

| Antibiotics | Drug resistant genes | Loci in H37Rv | Wild type | Mutant type | Codon change |
|-------------|----------------------|---------------|-----------|-------------|--------------|
| RIFAMPICIN  | rpoB                 | 760314        | G         | T           | V170F        |
| RIFAMPICIN  | rpoB                 | 760663        | C         | T           | A286V        |
| RIFAMPICIN  | rpoB                 | 761004        | A         | G           | T400A        |
| RIFAMPICIN  | rpoB                 | 761033        | G         | T           | Q409H        |
| RIFAMPICIN  | rpoB                 | 761033        | G         | C           | Q409H        |
| RIFAMPICIN  | rpoB                 | 761074        | A         | C           | E423A        |
| RIFAMPICIN  | rpoB                 | 761076        | T         | C           | F424L        |
| RIFAMPICIN  | rpoB                 | 761076        | T         | G           | F424V        |
| RIFAMPICIN  | rpoB                 | 761077        | T         | C           | F424S        |
| RIFAMPICIN  | rpoB                 | 761078        | C         | A           | F424L        |
| RIFAMPICIN  | rpoB                 | 761078        | C         | G           | F424L        |
| RIFAMPICIN  | rpoB                 | 761082        | G         | A           | G426S        |
| RIFAMPICIN  | rpoB                 | 761083        | G         | A           | G426D        |
| RIFAMPICIN  | rpoB                 | 761085        | A         | T           | T427S        |
| RIFAMPICIN  | rpoB                 | 761085        | A         | C           | T427P        |
| RIFAMPICIN  | rpoB                 | 761085        | A         | G           | T427A        |
| RIFAMPICIN  | rpoB                 | 761086        | C         | G           | T427S        |
| RIFAMPICIN  | rpoB                 | 761088        | A         | C           | S428R        |
| RIFAMPICIN  | rpoB                 | 761089        | G         | T           | S428I        |
| RIFAMPICIN  | rpoB                 | 761089        | G         | C           | S428T        |
| RIFAMPICIN  | rpoB                 | 761090        | C         | A           | S428R        |
| RIFAMPICIN  | rpoB                 | 761090        | C         | G           | S428R        |
| RIFAMPICIN  | rpoB                 | 761091        | C         | A           | Q429K        |
| RIFAMPICIN  | rpoB                 | 761093        | G         | T           | Q429H        |
| RIFAMPICIN  | rpoB                 | 761093        | G         | C           | Q429H        |
| RIFAMPICIN  | rpoB                 | 761094        | C         | G           | L430V        |
| RIFAMPICIN  | rpoB                 | 761095        | T         | C           | L430P        |
| RIFAMPICIN  | rpoB                 | 761095        | T         | G           | L430R        |
| RIFAMPICIN  | rpoB                 | 761097        | A         | C           | S431R        |
| RIFAMPICIN  | rpoB                 | 761097        | A         | G           | S431G        |
| RIFAMPICIN  | rpoB                 | 761098        | G         | T           | S431I        |
| RIFAMPICIN  | rpoB                 | 761098        | G         | C           | S431T        |
| RIFAMPICIN  | rpoB                 | 761099        | C         | A           | S431R        |
| RIFAMPICIN  | rpoB                 | 761099        | C         | G           | S431R        |
| RIFAMPICIN  | rpoB                 | 761100        | C         | A           | Q432K        |
| RIFAMPICIN  | rpoB                 | 761100        | C         | T           | Q432*        |
| RIFAMPICIN  | rpoB                 | 761100        | C         | G           | Q432E        |
| RIFAMPICIN  | rpoB                 | 761101        | A         | T           | Q432L        |
| RIFAMPICIN  | rpoB                 | 761101        | A         | C           | Q432P        |
| RIFAMPICIN  | rpoB                 | 761101        | A         | G           | Q432R        |
| RIFAMPICIN  | rpoB                 | 761102        | A         | T           | Q432H        |
| RIFAMPICIN  | rpoB                 | 761102        | A         | C           | Q432H        |
| RIFAMPICIN  | rpoB                 | 761103        | T         | C           | F433L        |
| RIFAMPICIN  | rpoB                 | 761103        | T         | G           | F433V        |
| RIFAMPICIN  | rpoB                 | 761105        | C         | A           | F433L        |
| RIFAMPICIN  | rpoB                 | 761105        | C         | G           | F433L        |
| RIFAMPICIN  | rpoB                 | 761107        | T         | C           | M434T        |
| RIFAMPICIN  | rpoB                 | 761108        | G         | A           | M434I        |

|            |      |        |   |   |       |
|------------|------|--------|---|---|-------|
| RIFAMPICIN | rpoB | 761108 | G | T | M434I |
| RIFAMPICIN | rpoB | 761108 | G | C | M434I |
| RIFAMPICIN | rpoB | 761109 | G | A | D435N |
| RIFAMPICIN | rpoB | 761109 | G | T | D435Y |
| RIFAMPICIN | rpoB | 761109 | G | C | D435H |
| RIFAMPICIN | rpoB | 761110 | A | T | D435V |
| RIFAMPICIN | rpoB | 761110 | A | C | D435A |
| RIFAMPICIN | rpoB | 761110 | A | G | D435G |
| RIFAMPICIN | rpoB | 761111 | C | A | D435E |
| RIFAMPICIN | rpoB | 761111 | C | G | D435E |
| RIFAMPICIN | rpoB | 761113 | A | T | Q436L |
| RIFAMPICIN | rpoB | 761114 | G | T | Q436H |
| RIFAMPICIN | rpoB | 761114 | G | C | Q436H |
| RIFAMPICIN | rpoB | 761115 | A | T | N437Y |
| RIFAMPICIN | rpoB | 761115 | A | C | N437H |
| RIFAMPICIN | rpoB | 761115 | A | G | N437D |
| RIFAMPICIN | rpoB | 761116 | A | T | N437I |
| RIFAMPICIN | rpoB | 761116 | A | C | N437T |
| RIFAMPICIN | rpoB | 761120 | C | A | N438K |
| RIFAMPICIN | rpoB | 761120 | C | G | N438K |
| RIFAMPICIN | rpoB | 761124 | C | A | L440M |
| RIFAMPICIN | rpoB | 761125 | T | C | L440P |
| RIFAMPICIN | rpoB | 761128 | C | T | S441L |
| RIFAMPICIN | rpoB | 761128 | C | G | S441W |
| RIFAMPICIN | rpoB | 761130 | G | T | G442W |
| RIFAMPICIN | rpoB | 761131 | G | C | G442A |
| RIFAMPICIN | rpoB | 761134 | T | C | L443S |
| RIFAMPICIN | rpoB | 761134 | T | G | L443W |
| RIFAMPICIN | rpoB | 761136 | A | C | T444P |
| RIFAMPICIN | rpoB | 761137 | C | T | T444I |
| RIFAMPICIN | rpoB | 761139 | C | A | H445N |
| RIFAMPICIN | rpoB | 761139 | C | T | H445Y |
| RIFAMPICIN | rpoB | 761139 | C | G | H445D |
| RIFAMPICIN | rpoB | 761140 | A | T | H445L |
| RIFAMPICIN | rpoB | 761140 | A | C | H445P |
| RIFAMPICIN | rpoB | 761140 | A | G | H445R |
| RIFAMPICIN | rpoB | 761141 | C | A | H445Q |
| RIFAMPICIN | rpoB | 761141 | C | G | H445Q |
| RIFAMPICIN | rpoB | 761142 | A | C | K446Q |
| RIFAMPICIN | rpoB | 761144 | G | T | K446N |
| RIFAMPICIN | rpoB | 761144 | G | C | K446N |
| RIFAMPICIN | rpoB | 761146 | G | A | R447H |
| RIFAMPICIN | rpoB | 761146 | G | C | R447P |
| RIFAMPICIN | rpoB | 761155 | C | T | S450L |
| RIFAMPICIN | rpoB | 761155 | C | G | S450W |
| RIFAMPICIN | rpoB | 761161 | T | C | L452P |
| RIFAMPICIN | rpoB | 761166 | C | T | P454S |
| RIFAMPICIN | rpoB | 761167 | C | A | P454H |
| RIFAMPICIN | rpoB | 761167 | C | T | P454L |
| RIFAMPICIN | rpoB | 761167 | C | G | P454R |
| RIFAMPICIN | rpoB | 761176 | T | C | L457P |

|            |                |         |   |   |       |
|------------|----------------|---------|---|---|-------|
| RIFAMPICIN | rpoB           | 761185  | A | G | E460G |
| RIFAMPICIN | rpoB           | 761196  | C | A | L464M |
| RIFAMPICIN | rpoB           | 761220  | T | G | S472A |
| RIFAMPICIN | rpoB           | 761244  | A | G | I480V |
| RIFAMPICIN | rpoB           | 761245  | T | C | I480T |
| RIFAMPICIN | rpoB           | 761248  | A | G | E481G |
| RIFAMPICIN | rpoB           | 761250  | A | C | T482P |
| RIFAMPICIN | rpoB           | 761254  | C | T | P483L |
| RIFAMPICIN | rpoB           | 761274  | C | G | L490V |
| RIFAMPICIN | rpoB           | 761277  | A | T | I491F |
| RIFAMPICIN | rpoB           | 761284  | C | T | S493L |
| RIFAMPICIN | rpoB           | 761460  | C | T | R552C |
| RIFAMPICIN | rpoB           | 761582  | G | T | E592D |
| RIFAMPICIN | rpoB           | 761582  | G | C | E592D |
| RIFAMPICIN | rpoB           | 762089  | G | T | E761D |
| RIFAMPICIN | rpoB           | 762089  | G | C | E761D |
| ISONIAZID  | ahpC           | 2726196 | C | T | P2S   |
| ISONIAZID  | ahpC           | 2726206 | C | T | T5I   |
| ISONIAZID  | ahpC           | 2726220 | T | A | F10I  |
| ISONIAZID  | ahpC           | 2726289 | G | A | D33N  |
| ISONIAZID  | ahpC           | 2726409 | G | C | D73H  |
| ISONIAZID  | ahpC           | 2726418 | G | A | E76K  |
| ISONIAZID  | ahpC           | 2726764 | T | G | L191R |
| ISONIAZID  | ahpC_promoter  | 2726112 | C | T | C-81T |
| ISONIAZID  | ahpC_promoter  | 2726119 | G | A | G-74A |
| ISONIAZID  | ahpC_promoter  | 2726127 | G | A | G-66A |
| ISONIAZID  | ahpC_promoter  | 2726139 | C | T | C-54T |
| ISONIAZID  | ahpC_promoter  | 2726141 | C | T | C-52T |
| ISONIAZID  | ahpC_promoter  | 2726142 | G | T | G-51T |
| ISONIAZID  | ahpC_promoter  | 2726144 | T | G | T-49G |
| ISONIAZID  | ahpC_promoter  | 2726145 | G | A | G-48A |
| ISONIAZID  | ahpC_promoter  | 2726145 | G | T | G-48T |
| ISONIAZID  | ahpC_promoter  | 2726149 | T | A | T-44A |
| ISONIAZID  | ahpC_promoter  | 2726154 | C | T | C-39T |
| ISONIAZID  | ahpC_promoter  | 2726173 | C | T | C-20T |
| ISONIAZID  | ahpC_promoter  | 2726188 | G | A | G-5A  |
| ISONIAZID  | ahpC_promoter  | 2726189 | A | G | A-4G  |
| ISONIAZID  | fabG1_promoter | 1673348 | A | T | A-92T |
| ISONIAZID  | fabG1_promoter | 1673373 | G | C | G-67C |
| ISONIAZID  | fabG1_promoter | 1673416 | G | T | G-24T |
| ISONIAZID  | fabG1_promoter | 1673423 | G | T | G-17T |
| ISONIAZID  | fabG1_promoter | 1673424 | A | G | A-16G |
| ISONIAZID  | fabG1_promoter | 1673425 | C | T | C-15T |
| ISONIAZID  | fabG1_promoter | 1673429 | A | T | A-11T |
| ISONIAZID  | fabG1_promoter | 1673432 | T | A | T-8A  |
| ISONIAZID  | fabG1_promoter | 1673432 | T | C | T-8C  |
| ISONIAZID  | fabG1_promoter | 1673432 | T | G | T-8G  |
| ISONIAZID  | fabG1_promoter | 1673435 | T | A | T-5A  |
| ISONIAZID  | inhA           | 1674225 | A | T | K8N   |
| ISONIAZID  | inhA           | 1674225 | A | C | K8N   |
| ISONIAZID  | inhA           | 1674232 | C | G | L11V  |

|           |      |         |   |   |       |
|-----------|------|---------|---|---|-------|
| ISONIAZID | inhA | 1674248 | T | C | I16T  |
| ISONIAZID | inhA | 1674262 | A | G | I21V  |
| ISONIAZID | inhA | 1674263 | T | A | I21N  |
| ISONIAZID | inhA | 1674263 | T | C | I21T  |
| ISONIAZID | inhA | 1674319 | G | T | G40W  |
| ISONIAZID | inhA | 1674341 | T | C | I47T  |
| ISONIAZID | inhA | 1674481 | T | G | S94A  |
| ISONIAZID | inhA | 1674482 | C | T | S94L  |
| ISONIAZID | inhA | 1674482 | C | G | S94W  |
| ISONIAZID | inhA | 1674485 | T | C | I95T  |
| ISONIAZID | inhA | 1674782 | T | C | I194T |
| ISONIAZID | kasA | 2518310 | G | A | D66N  |
| ISONIAZID | kasA | 2518345 | G | A | M77I  |
| ISONIAZID | kasA | 2518345 | G | T | M77I  |
| ISONIAZID | kasA | 2518345 | G | C | M77I  |
| ISONIAZID | kasA | 2518476 | G | A | R121K |
| ISONIAZID | kasA | 2518919 | G | A | G269S |
| ISONIAZID | kasA | 2519048 | G | A | G312S |
| ISONIAZID | kasA | 2519274 | G | A | G387D |
| ISONIAZID | kasA | 2519351 | T | C | F413L |
| ISONIAZID | kasA | 2519353 | C | A | F413L |
| ISONIAZID | kasA | 2519353 | C | G | F413L |
| ISONIAZID | katG | 2153908 | T | G | D735A |
| ISONIAZID | katG | 2153909 | C | T | D735N |
| ISONIAZID | katG | 2153928 | C | A | W728C |
| ISONIAZID | katG | 2153928 | C | G | W728C |
| ISONIAZID | katG | 2153932 | G | T | A727D |
| ISONIAZID | katG | 2153962 | T | G | Q717P |
| ISONIAZID | katG | 2153966 | C | G | A716P |
| ISONIAZID | katG | 2153975 | C | G | A713P |
| ISONIAZID | katG | 2153983 | A | G | V710A |
| ISONIAZID | katG | 2154014 | A | G | S700P |
| ISONIAZID | katG | 2154028 | T | G | D695A |
| ISONIAZID | katG | 2154059 | C | G | G685R |
| ISONIAZID | katG | 2154154 | A | G | L653P |
| ISONIAZID | katG | 2154205 | G | T | A636E |
| ISONIAZID | katG | 2154212 | G | A | L634F |
| ISONIAZID | katG | 2154227 | C | T | G629S |
| ISONIAZID | katG | 2154256 | A | G | L619P |
| ISONIAZID | katG | 2154285 | C | A | M609I |
| ISONIAZID | katG | 2154285 | C | T | M609I |
| ISONIAZID | katG | 2154285 | C | G | M609I |
| ISONIAZID | katG | 2154293 | C | T | E607K |
| ISONIAZID | katG | 2154334 | C | T | G593D |
| ISONIAZID | katG | 2154347 | G | T | P589T |
| ISONIAZID | katG | 2154352 | A | G | L587P |
| ISONIAZID | katG | 2154353 | G | T | L587M |
| ISONIAZID | katG | 2154391 | G | A | A574V |
| ISONIAZID | katG | 2154391 | G | T | A574E |
| ISONIAZID | katG | 2154395 | C | T | D573N |
| ISONIAZID | katG | 2154412 | A | G | F567S |

|           |      |         |   |   |       |
|-----------|------|---------|---|---|-------|
| ISONIAZID | katG | 2154460 | G | C | A551G |
| ISONIAZID | katG | 2154463 | G | T | A550D |
| ISONIAZID | katG | 2154527 | T | C | N529D |
| ISONIAZID | katG | 2154538 | T | G | Q525P |
| ISONIAZID | katG | 2154569 | G | A | R515C |
| ISONIAZID | katG | 2154598 | C | G | W505S |
| ISONIAZID | katG | 2154599 | A | T | W505R |
| ISONIAZID | katG | 2154599 | A | G | W505R |
| ISONIAZID | katG | 2154606 | T | A | Q502H |
| ISONIAZID | katG | 2154606 | T | G | Q502H |
| ISONIAZID | katG | 2154625 | C | A | R496L |
| ISONIAZID | katG | 2154641 | C | A | G491C |
| ISONIAZID | katG | 2154648 | C | A | K488N |
| ISONIAZID | katG | 2154648 | C | G | K488N |
| ISONIAZID | katG | 2154658 | C | A | G485V |
| ISONIAZID | katG | 2154662 | G | T | R484S |
| ISONIAZID | katG | 2154681 | C | T | W477* |
| ISONIAZID | katG | 2154682 | C | T | W477* |
| ISONIAZID | katG | 2154695 | C | A | V473F |
| ISONIAZID | katG | 2154722 | C | A | A464S |
| ISONIAZID | katG | 2154725 | G | A | R463W |
| ISONIAZID | katG | 2154727 | A | G | I462T |
| ISONIAZID | katG | 2154730 | T | G | Q461P |
| ISONIAZID | katG | 2154737 | T | A | K459* |
| ISONIAZID | katG | 2154742 | C | A | S457I |
| ISONIAZID | katG | 2154767 | G | A | L449F |
| ISONIAZID | katG | 2154782 | C | T | A444T |
| ISONIAZID | katG | 2154808 | G | A | T435I |
| ISONIAZID | katG | 2154812 | G | A | Q434* |
| ISONIAZID | katG | 2154827 | G | A | P429S |
| ISONIAZID | katG | 2154830 | C | T | G428R |
| ISONIAZID | katG | 2154830 | C | G | G428R |
| ISONIAZID | katG | 2154841 | G | A | A424V |
| ISONIAZID | katG | 2154841 | G | T | A424E |
| ISONIAZID | katG | 2154841 | G | C | A424G |
| ISONIAZID | katG | 2154857 | C | G | D419H |
| ISONIAZID | katG | 2154859 | C | A | R418L |
| ISONIAZID | katG | 2154859 | C | T | R418Q |
| ISONIAZID | katG | 2154870 | C | A | K414N |
| ISONIAZID | katG | 2154870 | C | G | K414N |
| ISONIAZID | katG | 2154875 | A | G | Y413H |
| ISONIAZID | katG | 2154886 | G | T | A409D |
| ISONIAZID | katG | 2154921 | C | T | W397* |
| ISONIAZID | katG | 2154922 | C | T | W397* |
| ISONIAZID | katG | 2154932 | T | C | T394A |
| ISONIAZID | katG | 2154934 | A | T | I393N |
| ISONIAZID | katG | 2154961 | A | C | L384R |
| ISONIAZID | katG | 2154970 | T | C | D381G |
| ISONIAZID | katG | 2154973 | G | A | T380I |
| ISONIAZID | katG | 2154976 | G | A | A379V |
| ISONIAZID | katG | 2154979 | A | G | L378P |

|           |      |         |   |   |       |
|-----------|------|---------|---|---|-------|
| ISONIAZID | katG | 2155018 | G | A | P365L |
| ISONIAZID | katG | 2155030 | G | T | A361D |
| ISONIAZID | katG | 2155043 | C | T | D357N |
| ISONIAZID | katG | 2155043 | C | G | D357H |
| ISONIAZID | katG | 2155058 | G | A | Q352* |
| ISONIAZID | katG | 2155064 | C | A | A350S |
| ISONIAZID | katG | 2155064 | C | T | A350T |
| ISONIAZID | katG | 2155078 | T | G | K345T |
| ISONIAZID | katG | 2155090 | C | G | W341S |
| ISONIAZID | katG | 2155102 | T | A | Y337F |
| ISONIAZID | katG | 2155102 | T | C | Y337C |
| ISONIAZID | katG | 2155105 | A | C | L336R |
| ISONIAZID | katG | 2155108 | A | G | I335T |
| ISONIAZID | katG | 2155109 | T | C | I335V |
| ISONIAZID | katG | 2155121 | T | A | S331C |
| ISONIAZID | katG | 2155128 | C | A | W328C |
| ISONIAZID | katG | 2155128 | C | G | W328C |
| ISONIAZID | katG | 2155129 | C | A | W328L |
| ISONIAZID | katG | 2155129 | C | G | W328S |
| ISONIAZID | katG | 2155130 | A | C | W328G |
| ISONIAZID | katG | 2155135 | G | A | T326M |
| ISONIAZID | katG | 2155142 | T | G | T324P |
| ISONIAZID | katG | 2155149 | C | A | W321C |
| ISONIAZID | katG | 2155149 | C | T | W321* |
| ISONIAZID | katG | 2155149 | C | G | W321C |
| ISONIAZID | katG | 2155150 | C | A | W321L |
| ISONIAZID | katG | 2155150 | C | T | W321* |
| ISONIAZID | katG | 2155150 | C | G | W321S |
| ISONIAZID | katG | 2155151 | A | T | W321R |
| ISONIAZID | katG | 2155151 | A | G | W321R |
| ISONIAZID | katG | 2155163 | T | C | I317V |
| ISONIAZID | katG | 2155163 | T | G | I317L |
| ISONIAZID | katG | 2155165 | C | T | G316D |
| ISONIAZID | katG | 2155166 | C | T | G316S |
| ISONIAZID | katG | 2155167 | G | T | S315R |
| ISONIAZID | katG | 2155167 | G | C | S315R |
| ISONIAZID | katG | 2155168 | C | A | S315I |
| ISONIAZID | katG | 2155168 | C | T | S315N |
| ISONIAZID | katG | 2155168 | C | G | S315T |
| ISONIAZID | katG | 2155169 | T | C | S315G |
| ISONIAZID | katG | 2155169 | T | G | S315R |
| ISONIAZID | katG | 2155179 | G | T | D311E |
| ISONIAZID | katG | 2155179 | G | C | D311E |
| ISONIAZID | katG | 2155180 | T | C | D311G |
| ISONIAZID | katG | 2155181 | C | A | D311Y |
| ISONIAZID | katG | 2155186 | C | T | G309D |
| ISONIAZID | katG | 2155187 | C | A | G309C |
| ISONIAZID | katG | 2155187 | C | T | G309S |
| ISONIAZID | katG | 2155190 | T | G | T308P |
| ISONIAZID | katG | 2155192 | C | T | G307E |
| ISONIAZID | katG | 2155192 | C | G | G307A |



|           |      |         |   |   |       |
|-----------|------|---------|---|---|-------|
| ISONIAZID | katG | 2155193 | C | T | G307R |
| ISONIAZID | katG | 2155193 | C | G | G307R |
| ISONIAZID | katG | 2155198 | C | G | G305A |
| ISONIAZID | katG | 2155201 | T | G | Y304S |
| ISONIAZID | katG | 2155206 | G | T | S302R |
| ISONIAZID | katG | 2155206 | G | C | S302R |
| ISONIAZID | katG | 2155208 | T | G | S302R |
| ISONIAZID | katG | 2155212 | C | T | W300* |
| ISONIAZID | katG | 2155213 | C | T | W300* |
| ISONIAZID | katG | 2155214 | A | C | W300G |
| ISONIAZID | katG | 2155216 | C | G | G299A |
| ISONIAZID | katG | 2155217 | C | A | G299C |
| ISONIAZID | katG | 2155222 | C | A | G297V |
| ISONIAZID | katG | 2155228 | T | G | Q295P |
| ISONIAZID | katG | 2155241 | C | G | A291P |
| ISONIAZID | katG | 2155245 | C | A | E289D |
| ISONIAZID | katG | 2155245 | C | G | E289D |
| ISONIAZID | katG | 2155258 | C | T | G285D |
| ISONIAZID | katG | 2155270 | G | A | A281V |
| ISONIAZID | katG | 2155276 | C | T | G279D |
| ISONIAZID | katG | 2155288 | G | C | T275S |
| ISONIAZID | katG | 2155289 | T | A | T275S |
| ISONIAZID | katG | 2155289 | T | C | T275A |
| ISONIAZID | katG | 2155289 | T | G | T275P |
| ISONIAZID | katG | 2155322 | C | T | A264T |
| ISONIAZID | katG | 2155327 | G | C | T262R |
| ISONIAZID | katG | 2155331 | C | T | E261K |
| ISONIAZID | katG | 2155335 | G | T | D259E |
| ISONIAZID | katG | 2155335 | G | C | D259E |
| ISONIAZID | katG | 2155339 | T | C | N258S |
| ISONIAZID | katG | 2155341 | C | A | M257I |
| ISONIAZID | katG | 2155341 | C | T | M257I |
| ISONIAZID | katG | 2155341 | C | G | M257I |
| ISONIAZID | katG | 2155342 | A | G | M257T |
| ISONIAZID | katG | 2155356 | A | T | F252L |
| ISONIAZID | katG | 2155356 | A | C | F252L |
| ISONIAZID | katG | 2155358 | A | G | F252L |
| ISONIAZID | katG | 2155360 | G | A | T251M |
| ISONIAZID | katG | 2155367 | G | A | R249C |
| ISONIAZID | katG | 2155385 | C | A | A243S |
| ISONIAZID | katG | 2155398 | G | T | N238K |
| ISONIAZID | katG | 2155398 | G | C | N238K |
| ISONIAZID | katG | 2155405 | T | G | N236T |
| ISONIAZID | katG | 2155411 | C | T | G234E |
| ISONIAZID | katG | 2155412 | C | T | G234R |
| ISONIAZID | katG | 2155412 | C | G | G234R |
| ISONIAZID | katG | 2155423 | A | G | V230A |
| ISONIAZID | katG | 2155426 | T | A | Y229F |
| ISONIAZID | katG | 2155442 | G | C | Q224E |
| ISONIAZID | katG | 2155458 | G | T | N218K |
| ISONIAZID | katG | 2155458 | G | C | N218K |

|           |      |         |   |   |       |
|-----------|------|---------|---|---|-------|
| ISONIAZID | katG | 2155514 | T | A | K200* |
| ISONIAZID | katG | 2155518 | C | T | W198* |
| ISONIAZID | katG | 2155519 | C | T | W198* |
| ISONIAZID | katG | 2155529 | C | T | E195K |
| ISONIAZID | katG | 2155541 | A | T | W191R |
| ISONIAZID | katG | 2155541 | A | G | W191R |
| ISONIAZID | katG | 2155555 | C | A | G186V |
| ISONIAZID | katG | 2155573 | G | T | T180K |
| ISONIAZID | katG | 2155584 | C | A | M176I |
| ISONIAZID | katG | 2155584 | C | T | M176I |
| ISONIAZID | katG | 2155584 | C | G | M176I |
| ISONIAZID | katG | 2155597 | G | A | A172V |
| ISONIAZID | katG | 2155598 | C | T | A172T |
| ISONIAZID | katG | 2155606 | C | G | G169A |
| ISONIAZID | katG | 2155628 | C | T | A162T |
| ISONIAZID | katG | 2155633 | G | A | S160L |
| ISONIAZID | katG | 2155648 | T | C | Y155C |
| ISONIAZID | katG | 2155648 | T | G | Y155S |
| ISONIAZID | katG | 2155669 | A | C | L148R |
| ISONIAZID | katG | 2155684 | T | G | K143T |
| ISONIAZID | katG | 2155687 | T | G | D142A |
| ISONIAZID | katG | 2155689 | C | A | L141F |
| ISONIAZID | katG | 2155689 | C | G | L141F |
| ISONIAZID | katG | 2155692 | G | T | S140R |
| ISONIAZID | katG | 2155692 | G | C | S140R |
| ISONIAZID | katG | 2155693 | C | T | S140N |
| ISONIAZID | katG | 2155694 | T | C | S140G |
| ISONIAZID | katG | 2155694 | T | G | S140R |
| ISONIAZID | katG | 2155697 | C | G | A139P |
| ISONIAZID | katG | 2155699 | T | C | N138S |
| ISONIAZID | katG | 2155699 | T | G | N138T |
| ISONIAZID | katG | 2155700 | T | C | N138D |
| ISONIAZID | katG | 2155700 | T | G | N138H |
| ISONIAZID | katG | 2155729 | C | G | R128P |
| ISONIAZID | katG | 2155732 | T | G | Q127P |
| ISONIAZID | katG | 2155734 | C | A | M126I |
| ISONIAZID | katG | 2155734 | C | T | M126I |
| ISONIAZID | katG | 2155734 | C | G | M126I |
| ISONIAZID | katG | 2155739 | C | A | G125C |
| ISONIAZID | katG | 2155750 | C | A | G121V |
| ISONIAZID | katG | 2155751 | C | A | G121C |
| ISONIAZID | katG | 2155762 | T | G | D117A |
| ISONIAZID | katG | 2155783 | G | A | A110V |
| ISONIAZID | katG | 2155786 | G | A | A109V |
| ISONIAZID | katG | 2155788 | G | T | H108Q |
| ISONIAZID | katG | 2155788 | G | C | H108Q |
| ISONIAZID | katG | 2155790 | G | C | H108D |
| ISONIAZID | katG | 2155791 | C | T | W107* |
| ISONIAZID | katG | 2155792 | C | T | W107* |
| ISONIAZID | katG | 2155793 | A | T | W107R |
| ISONIAZID | katG | 2155793 | A | G | W107R |

|           |               |         |   |   |       |
|-----------|---------------|---------|---|---|-------|
| ISONIAZID | katG          | 2155795 | G | A | A106V |
| ISONIAZID | katG          | 2155801 | C | A | R104L |
| ISONIAZID | katG          | 2155801 | C | T | R104Q |
| ISONIAZID | katG          | 2155816 | C | T | G99E  |
| ISONIAZID | katG          | 2155826 | C | A | G96C  |
| ISONIAZID | katG          | 2155831 | T | C | D94G  |
| ISONIAZID | katG          | 2155831 | T | G | D94A  |
| ISONIAZID | katG          | 2155841 | A | T | W91R  |
| ISONIAZID | katG          | 2155841 | A | G | W91R  |
| ISONIAZID | katG          | 2155842 | C | T | W90*  |
| ISONIAZID | katG          | 2155843 | C | T | W90*  |
| ISONIAZID | katG          | 2155849 | T | C | Q88R  |
| ISONIAZID | katG          | 2155859 | T | G | T85P  |
| ISONIAZID | katG          | 2155860 | C | A | M84I  |
| ISONIAZID | katG          | 2155860 | C | T | M84I  |
| ISONIAZID | katG          | 2155860 | C | G | M84I  |
| ISONIAZID | katG          | 2155891 | T | C | D74G  |
| ISONIAZID | katG          | 2155892 | C | A | D74Y  |
| ISONIAZID | katG          | 2155897 | T | C | D72G  |
| ISONIAZID | katG          | 2155900 | A | T | I71N  |
| ISONIAZID | katG          | 2155916 | C | G | A66P  |
| ISONIAZID | katG          | 2155919 | C | T | A65T  |
| ISONIAZID | katG          | 2155923 | G | T | D63E  |
| ISONIAZID | katG          | 2155923 | G | C | D63E  |
| ISONIAZID | katG          | 2155931 | C | T | A61T  |
| ISONIAZID | katG          | 2155969 | A | T | L48Q  |
| ISONIAZID | katG          | 2155998 | C | T | W38*  |
| ISONIAZID | katG          | 2155999 | C | T | W38*  |
| ISONIAZID | katG          | 2156009 | T | C | N35D  |
| ISONIAZID | katG          | 2156056 | C | T | G19D  |
| ISONIAZID | katG          | 2156062 | C | T | S17N  |
| ISONIAZID | katG          | 2156078 | T | G | T12P  |
| ISONIAZID | katG          | 2156081 | T | C | T11A  |
| ISONIAZID | katG          | 2156108 | G | A | P2S   |
| ISONIAZID | katG          | 2156110 | A | G | V1A   |
| ISONIAZID | katG          | 2156111 | C | A | V1L   |
| ISONIAZID | katG          | 2156111 | C | G | V1L   |
| ISONIAZID | katG_promoter | 2156118 | C | T | C-7T  |
| ISONIAZID | katG_promoter | 2156121 | T | G | T-10G |
| ISONIAZID | katG_promoter | 2156123 | C | T | C-12T |
| ISONIAZID | inhA          | 1674434 | T | C | V78A  |

**Supplementary Table 3. The 1,468 MDR-TB strains that were included in study.**

| Strain ID | Rifampicin            | Isoniazid                                                                 | Country origin | Reference                                                                   |
|-----------|-----------------------|---------------------------------------------------------------------------|----------------|-----------------------------------------------------------------------------|
| 2009_0645 | rpoB_S450L            | katG_S315T                                                                | China          | Yang, C, et al. <i>The Lancet Infectious Diseases</i> 17.3 (2017): 275-284. |
| 2009_0647 | rpoB_H445Y            | katG_S315T                                                                | China          | Yang, C, et al. <i>The Lancet Infectious Diseases</i> 17.3 (2017): 275-284. |
| 2009_0994 | rpoB_S450L            | fabG1_promoter_C1673425T                                                  | China          | Yang, C, et al. <i>The Lancet Infectious Diseases</i> 17.3 (2017): 275-284. |
| 2009_1011 | rpoB_S450L            | katG_S315T                                                                | China          | Yang, C, et al. <i>The Lancet Infectious Diseases</i> 17.3 (2017): 275-284. |
| 2009_1058 | rpoB_S450L            | katG_S315T                                                                | China          | Yang, C, et al. <i>The Lancet Infectious Diseases</i> 17.3 (2017): 275-284. |
| 2009_1060 | rpoB_S450L            | katG_S315T                                                                | China          | Yang, C, et al. <i>The Lancet Infectious Diseases</i> 17.3 (2017): 275-284. |
| 2009_1098 | rpoB_S450L            | katG_S315T                                                                | China          | Yang, C, et al. <i>The Lancet Infectious Diseases</i> 17.3 (2017): 275-284. |
| 2009_1121 | rpoB_L430P,rpoB_H445Q | katG_S315T                                                                | China          | Yang, C, et al. <i>The Lancet Infectious Diseases</i> 17.3 (2017): 275-284. |
| 2009_116  | rpoB_S450L            | katG_S315T                                                                | China          | Yang, C, et al. <i>The Lancet Infectious Diseases</i> 17.3 (2017): 275-284. |
| 2009_1161 | rpoB_S450L            | katG_S315T                                                                | China          | Yang, C, et al. <i>The Lancet Infectious Diseases</i> 17.3 (2017): 275-284. |
| 2009_1303 | rpoB_S450L            | katG_S315T                                                                | China          | Yang, C, et al. <i>The Lancet Infectious Diseases</i> 17.3 (2017): 275-284. |
| 2009_1333 | rpoB_S450L            | katG_S315T                                                                | China          | Yang, C, et al. <i>The Lancet Infectious Diseases</i> 17.3 (2017): 275-284. |
| 2009_1413 | rpoB_H445Y            | katG_S315T                                                                | China          | Yang, C, et al. <i>The Lancet Infectious Diseases</i> 17.3 (2017): 275-284. |
| 2009_1543 | rpoB_S450L            | katG_S315T                                                                | China          | Yang, C, et al. <i>The Lancet Infectious Diseases</i> 17.3 (2017): 275-284. |
| 2009_1578 | rpoB_S450L            | ahpC_promoter_C2726141T,fabG1_promoter_C1673425T, katG_promoter_T2156121G | China          | Yang, C, et al. <i>The Lancet Infectious Diseases</i> 17.3 (2017): 275-284. |
| 2009_1585 | rpoB_D435V            | katG_S315T                                                                | China          | Yang, C, et al. <i>The Lancet Infectious Diseases</i> 17.3 (2017): 275-284. |
| 2009_1687 | rpoB_S450L            | katG_S315T                                                                | China          | Yang, C, et al. <i>The Lancet Infectious Diseases</i> 17.3 (2017): 275-284. |
| 2009_1780 | rpoB_H445Y            | katG_S315T                                                                | China          | Yang, C, et al. <i>The Lancet Infectious Diseases</i> 17.3 (2017): 275-284. |
| 2009_1862 | rpoB_S450L            | katG_S315T                                                                | China          | Yang, C, et al. <i>The Lancet Infectious Diseases</i> 17.3 (2017): 275-284. |
| 2009_1924 | rpoB_S450L            | katG_S315T                                                                | China          | Yang, C, et al. <i>The Lancet Infectious Diseases</i> 17.3 (2017): 275-284. |
| 2009_1928 | rpoB_H445N            | katG_S315T                                                                | China          | Yang, C, et al. <i>The Lancet Infectious Diseases</i> 17.3 (2017): 275-284. |
| 2009_1994 | rpoB_H445N            | katG_S315T                                                                | China          | Yang, C, et al. <i>The Lancet Infectious Diseases</i> 17.3 (2017): 275-284. |
| 2009_294  | rpoB_S450L            | katG_S315T                                                                | China          | Yang, C, et al. <i>The Lancet Infectious Diseases</i> 17.3 (2017): 275-284. |
| 2009_295  | rpoB_S450L            | katG_S315T                                                                | China          | Yang, C, et al. <i>The Lancet Infectious Diseases</i> 17.3 (2017): 275-284. |
| 2009_511  | rpoB_Q432P            | fabG1_promoter_C1673425T                                                  | China          | Yang, C, et al. <i>The Lancet Infectious Diseases</i> 17.3 (2017): 275-284. |
| 2009_620  | rpoB_L430P,rpoB_Q432P | katG_S315T                                                                | China          | Yang, C, et al. <i>The Lancet Infectious Diseases</i> 17.3 (2017): 275-284. |
| 2009_643  | rpoB_S450L            | katG_S315T                                                                | China          | Yang, C, et al. <i>The Lancet Infectious Diseases</i> 17.3 (2017): 275-284. |
| 2009_682  | rpoB_S450L            | katG_S315T                                                                | China          | Yang, C, et al. <i>The Lancet Infectious Diseases</i> 17.3 (2017): 275-284. |
| 2009_716  | rpoB_H445Y            | katG_S315T                                                                | China          | Yang, C, et al. <i>The Lancet Infectious Diseases</i> 17.3 (2017): 275-284. |
| 2009_783  | rpoB_L430P,rpoB_D435G | katG_S315T                                                                | China          | Yang, C, et al. <i>The Lancet Infectious Diseases</i> 17.3 (2017): 275-284. |
| 2009_784  | rpoB_S450L            | katG_S315T                                                                | China          | Yang, C, et al. <i>The Lancet Infectious Diseases</i> 17.3 (2017): 275-284. |
| 2009_799  | rpoB_D435V            | katG_S315T                                                                | China          | Yang, C, et al. <i>The Lancet Infectious Diseases</i> 17.3 (2017): 275-284. |
| 2009_817  | rpoB_S450L            | katG_S315T                                                                | China          | Yang, C, et al. <i>The Lancet Infectious Diseases</i> 17.3 (2017): 275-284. |
| 2009_956  | rpoB_H445Y            | katG_S315T                                                                | China          | Yang, C, et al. <i>The Lancet Infectious Diseases</i> 17.3 (2017): 275-284. |
| 2010_0020 | rpoB_L430P,rpoB_S431G | katG_S315T, fabG1_promoter_T1673432C                                      | China          | Yang, C, et al. <i>The Lancet Infectious Diseases</i> 17.3 (2017): 275-284. |
| 2010_0208 | rpoB_S450L            | katG_S315T                                                                | China          | Yang, C, et al. <i>The Lancet Infectious Diseases</i> 17.3 (2017): 275-284. |
| 2010_0560 | rpoB_S450L            | katG_S315T                                                                | China          | Yang, C, et al. <i>The Lancet Infectious Diseases</i> 17.3 (2017): 275-284. |
| 2010_0614 | rpoB_H445Y            | ahpC_promoter_G2726145A                                                   | China          | Yang, C, et al. <i>The Lancet Infectious Diseases</i> 17.3 (2017): 275-284. |
| 2010_0757 | rpoB_L430P,rpoB_D435G | katG_S315T                                                                | China          | Yang, C, et al. <i>The Lancet Infectious Diseases</i> 17.3 (2017): 275-284. |
| 2010_0768 | rpoB_H445Y            | katG_S315T                                                                | China          | Yang, C, et al. <i>The Lancet Infectious Diseases</i> 17.3 (2017): 275-284. |
| 2010_0841 | rpoB_S450L            | katG_S315T                                                                | China          | Yang, C, et al. <i>The Lancet Infectious Diseases</i> 17.3 (2017): 275-284. |
| 2010_0888 | rpoB_S450L            | katG_S315T                                                                | China          | Yang, C, et al. <i>The Lancet Infectious Diseases</i> 17.3 (2017): 275-284. |
| 2010_1007 | rpoB_S450L            | katG_S315T                                                                | China          | Yang, C, et al. <i>The Lancet Infectious Diseases</i> 17.3 (2017): 275-284. |
| 2010_1180 | rpoB_H445R            | katG_S315T                                                                | China          | Yang, C, et al. <i>The Lancet Infectious Diseases</i> 17.3 (2017): 275-284. |
| 2010_122  | rpoB_S450L            | katG_S315T                                                                | China          | Yang, C, et al. <i>The Lancet Infectious Diseases</i> 17.3 (2017): 275-284. |
| 2010_1232 | rpoB_S450L            | katG_S315T                                                                | China          | Yang, C, et al. <i>The Lancet Infectious Diseases</i> 17.3 (2017): 275-284. |
| 2010_1603 | rpoB_S450W            | katG_S315T                                                                | China          | Yang, C, et al. <i>The Lancet Infectious Diseases</i> 17.3 (2017): 275-284. |
| 2010_1628 | rpoB_D435Y            | katG_S315T                                                                | China          | Yang, C, et al. <i>The Lancet Infectious Diseases</i> 17.3 (2017): 275-284. |
| 2010_1647 | rpoB_D435V            | katG_S315T                                                                | China          | Yang, C, et al. <i>The Lancet Infectious Diseases</i> 17.3 (2017): 275-284. |
| 2010_1730 | rpoB_S450L            | katG_S315T                                                                | China          | Yang, C, et al. <i>The Lancet Infectious Diseases</i> 17.3 (2017): 275-284. |
| 2010_1753 | rpoB_L430P,rpoB_Q432P | katG_S315T                                                                | China          | Yang, C, et al. <i>The Lancet Infectious Diseases</i> 17.3 (2017): 275-284. |
| 2010_1770 | rpoB_A286V,rpoB_S450L | katG_S315T, fabG1_promoter_T1673432C                                      | China          | Yang, C, et al. <i>The Lancet Infectious Diseases</i> 17.3 (2017): 275-284. |
| 2010_1781 | rpoB_L430P,rpoB_P454H | katG_S315T                                                                | China          | Yang, C, et al. <i>The Lancet Infectious Diseases</i> 17.3 (2017): 275-284. |
| 2010_183  | rpoB_S450L            | katG_S315T                                                                | China          | Yang, C, et al. <i>The Lancet Infectious Diseases</i> 17.3 (2017): 275-284. |



|           |                       |                                                 |       |                                                                             |
|-----------|-----------------------|-------------------------------------------------|-------|-----------------------------------------------------------------------------|
| 2012_1655 | rpoB_S450L,rpoB_I480V | fabG1_promoter_C1673425T                        | China | Yang, C, et al. <i>The Lancet Infectious Diseases</i> 17.3 (2017): 275-284. |
| 2012_1810 | rpoB_S450L            | fabG1_promoter_C1673425T                        | China | Yang, C, et al. <i>The Lancet Infectious Diseases</i> 17.3 (2017): 275-284. |
| 2012_1813 | rpoB_S450L            | katG_S315T                                      | China | Yang, C, et al. <i>The Lancet Infectious Diseases</i> 17.3 (2017): 275-284. |
| 2012_1828 | rpoB_L430P,rpoB_S431G | katG_S315T,fabG1_promoter_T1673432C             | China | Yang, C, et al. <i>The Lancet Infectious Diseases</i> 17.3 (2017): 275-284. |
| 2012_2121 | rpoB_H445Y            | katG_S315T                                      | China | Yang, C, et al. <i>The Lancet Infectious Diseases</i> 17.3 (2017): 275-284. |
| 2012_2164 | rpoB_S450L            | katG_S315T                                      | China | Yang, C, et al. <i>The Lancet Infectious Diseases</i> 17.3 (2017): 275-284. |
| 2009_4    | rpoB_H445D            | katG_S315T                                      | China | Yang, C, et al. <i>The Lancet Infectious Diseases</i> 17.3 (2017): 275-284. |
| 2009_7    | rpoB_S450L            | katG_S315T                                      | China | Yang, C, et al. <i>The Lancet Infectious Diseases</i> 17.3 (2017): 275-284. |
| SRR671719 | rpoB_L452P            | katG_S315N                                      | China | Zhang, H, et al. <i>Nature genetics</i> 45.10 (2013): 1255-1260.            |
| SRR671720 | rpoB_H445L            | fabG1_promoter_C1673425T                        | China | Zhang, H, et al. <i>Nature genetics</i> 45.10 (2013): 1255-1260.            |
| SRR671721 | rpoB_D435G,rpoB_H445D | katG_S315T                                      | China | Zhang, H, et al. <i>Nature genetics</i> 45.10 (2013): 1255-1260.            |
| SRR671722 | rpoB_S450L            | katG_S315T                                      | China | Zhang, H, et al. <i>Nature genetics</i> 45.10 (2013): 1255-1260.            |
| SRR671724 | rpoB_S450L            | fabG1_promoter_C1673425T                        | China | Zhang, H, et al. <i>Nature genetics</i> 45.10 (2013): 1255-1260.            |
| SRR671725 | rpoB_S450L            | katG_S315N                                      | China | Zhang, H, et al. <i>Nature genetics</i> 45.10 (2013): 1255-1260.            |
| SRR671726 | rpoB_S450L            | ahpC_promoter_G2726119A                         | China | Zhang, H, et al. <i>Nature genetics</i> 45.10 (2013): 1255-1260.            |
| SRR671731 | rpoB_H445D            | katG_S315T                                      | China | Zhang, H, et al. <i>Nature genetics</i> 45.10 (2013): 1255-1260.            |
| SRR671732 | rpoB_S450L            | katG_S315T                                      | China | Zhang, H, et al. <i>Nature genetics</i> 45.10 (2013): 1255-1260.            |
| SRR671733 | rpoB_L452P            | katG_S315N                                      | China | Zhang, H, et al. <i>Nature genetics</i> 45.10 (2013): 1255-1260.            |
| SRR671734 | rpoB_H445D            | katG_S315T                                      | China | Zhang, H, et al. <i>Nature genetics</i> 45.10 (2013): 1255-1260.            |
| SRR671735 | rpoB_S450L            | fabG1_promoter_C1673425T                        | China | Zhang, H, et al. <i>Nature genetics</i> 45.10 (2013): 1255-1260.            |
| SRR671736 | rpoB_S450L            | katG_W191R,fabG1_promoter_C1673425T             | China | Zhang, H, et al. <i>Nature genetics</i> 45.10 (2013): 1255-1260.            |
| SRR671737 | rpoB_S450L            | ahpC_promoter_G2726145A                         | China | Zhang, H, et al. <i>Nature genetics</i> 45.10 (2013): 1255-1260.            |
| SRR671738 | rpoB_Q429H,rpoB_H445Y | katG_S315T                                      | China | Zhang, H, et al. <i>Nature genetics</i> 45.10 (2013): 1255-1260.            |
| SRR671739 | rpoB_H445D            | katG_S315T                                      | China | Zhang, H, et al. <i>Nature genetics</i> 45.10 (2013): 1255-1260.            |
| SRR671740 | rpoB_H445Y            | katG_V1A                                        | China | Zhang, H, et al. <i>Nature genetics</i> 45.10 (2013): 1255-1260.            |
| SRR671742 | rpoB_H445D            | katG_S315T                                      | China | Zhang, H, et al. <i>Nature genetics</i> 45.10 (2013): 1255-1260.            |
| SRR671743 | rpoB_S450L            | fabG1_promoter_C1673425T                        | China | Zhang, H, et al. <i>Nature genetics</i> 45.10 (2013): 1255-1260.            |
| SRR671744 | rpoB_S450L            | katG_W191R,fabG1_promoter_C1673425T             | China | Zhang, H, et al. <i>Nature genetics</i> 45.10 (2013): 1255-1260.            |
| SRR671745 | rpoB_H445Y            | katG_S315T                                      | China | Zhang, H, et al. <i>Nature genetics</i> 45.10 (2013): 1255-1260.            |
| SRR671746 | rpoB_H445Y            | katG_S315T                                      | China | Zhang, H, et al. <i>Nature genetics</i> 45.10 (2013): 1255-1260.            |
| SRR671748 | rpoB_L430R,rpoB_D435G | katG_S315N                                      | China | Zhang, H, et al. <i>Nature genetics</i> 45.10 (2013): 1255-1260.            |
| SRR671749 | rpoB_H445R            | katG_S315T                                      | China | Zhang, H, et al. <i>Nature genetics</i> 45.10 (2013): 1255-1260.            |
| SRR671751 | rpoB_H445R            | katG_S315T,fabG1_promoter_T1673432C             | China | Zhang, H, et al. <i>Nature genetics</i> 45.10 (2013): 1255-1260.            |
| SRR671752 | rpoB_D435Y            | katG_S315T                                      | China | Zhang, H, et al. <i>Nature genetics</i> 45.10 (2013): 1255-1260.            |
| SRR671753 | rpoB_S450L            | katG_S315T                                      | China | Zhang, H, et al. <i>Nature genetics</i> 45.10 (2013): 1255-1260.            |
| SRR671754 | rpoB_S450L            | katG_S315T                                      | China | Zhang, H, et al. <i>Nature genetics</i> 45.10 (2013): 1255-1260.            |
| SRR671755 | rpoB_S450L            | katG_S315T                                      | China | Zhang, H, et al. <i>Nature genetics</i> 45.10 (2013): 1255-1260.            |
| SRR671758 | rpoB_H445R            | ahpC_promoter_C2726141T                         | China | Zhang, H, et al. <i>Nature genetics</i> 45.10 (2013): 1255-1260.            |
| SRR671759 | rpoB_D435Y,rpoB_H445D | katG_S315T,fabG1_promoter_T1673432C             | China | Zhang, H, et al. <i>Nature genetics</i> 45.10 (2013): 1255-1260.            |
| SRR671760 | rpoB_D435G,rpoB_L452P | katG_D419H                                      | China | Zhang, H, et al. <i>Nature genetics</i> 45.10 (2013): 1255-1260.            |
| SRR671761 | rpoB_H445Y,rpoB_E460G | inhA_S94A, katG_S315T, fabG1_promoter_C1673425T | China | Zhang, H, et al. <i>Nature genetics</i> 45.10 (2013): 1255-1260.            |
| SRR671765 | rpoB_S441L            | katG_S315T,fabG1_promoter_T1673432C             | China | Zhang, H, et al. <i>Nature genetics</i> 45.10 (2013): 1255-1260.            |
| SRR671766 | rpoB_S450L            | katG_S315T                                      | China | Zhang, H, et al. <i>Nature genetics</i> 45.10 (2013): 1255-1260.            |
| SRR671768 | rpoB_S450L            | katG_S315N                                      | China | Zhang, H, et al. <i>Nature genetics</i> 45.10 (2013): 1255-1260.            |
| SRR671769 | rpoB_H445D            | katG_Y155C                                      | China | Zhang, H, et al. <i>Nature genetics</i> 45.10 (2013): 1255-1260.            |
| SRR671770 | rpoB_V170F            | katG_L378P                                      | China | Zhang, H, et al. <i>Nature genetics</i> 45.10 (2013): 1255-1260.            |
| SRR671771 | rpoB_L452P            | katG_S315T                                      | China | Zhang, H, et al. <i>Nature genetics</i> 45.10 (2013): 1255-1260.            |
| SRR671774 | rpoB_H445D            | katG_Y155C                                      | China | Zhang, H, et al. <i>Nature genetics</i> 45.10 (2013): 1255-1260.            |
| SRR671779 | rpoB_S450L            | katG_S315T,fabG1_promoter_C1673425T             | China | Zhang, H, et al. <i>Nature genetics</i> 45.10 (2013): 1255-1260.            |

|           |                       |                                                                         |       |                                                           |
|-----------|-----------------------|-------------------------------------------------------------------------|-------|-----------------------------------------------------------|
| SRR671781 | rpoB_S450L            | katG_W191R,inhA_I19<br>4T,fabG1_promoter_C<br>1673425T                  | China | Zhang, H, et al. Nature genetics 45.10 (2013): 1255-1260. |
| SRR671785 | rpoB_D435G,rpoB_L452P | katG_S315T                                                              | China | Zhang, H, et al. Nature genetics 45.10 (2013): 1255-1260. |
| SRR671787 | rpoB_H445Y            | katG_S315T                                                              | China | Zhang, H, et al. Nature genetics 45.10 (2013): 1255-1260. |
| SRR671789 | rpoB_H445L            | katG_S315T                                                              | China | Zhang, H, et al. Nature genetics 45.10 (2013): 1255-1260. |
| SRR671791 | rpoB_D435V            | katG_S315T                                                              | China | Zhang, H, et al. Nature genetics 45.10 (2013): 1255-1260. |
| SRR671794 | rpoB_D435G,rpoB_L452P | katG_S315T                                                              | China | Zhang, H, et al. Nature genetics 45.10 (2013): 1255-1260. |
| SRR671795 | rpoB_F424L,rpoB_L430P | katG_S315T                                                              | China | Zhang, H, et al. Nature genetics 45.10 (2013): 1255-1260. |
| SRR671796 | rpoB_S450L            | fabG1_promoter_C167<br>3425T                                            | China | Zhang, H, et al. Nature genetics 45.10 (2013): 1255-1260. |
| SRR671797 | rpoB_S450L            | katG_S315T                                                              | China | Zhang, H, et al. Nature genetics 45.10 (2013): 1255-1260. |
| SRR671798 | rpoB_S450L            | katG_S315T                                                              | China | Zhang, H, et al. Nature genetics 45.10 (2013): 1255-1260. |
| SRR671799 | rpoB_S450L            | fabG1_promoter_C167<br>3425T                                            | China | Zhang, H, et al. Nature genetics 45.10 (2013): 1255-1260. |
| SRR671801 | rpoB_S450L            | katG_S315T                                                              | China | Zhang, H, et al. Nature genetics 45.10 (2013): 1255-1260. |
| SRR671804 | rpoB_D435A,rpoB_L452P | katG_S315T                                                              | China | Zhang, H, et al. Nature genetics 45.10 (2013): 1255-1260. |
| SRR671806 | rpoB_L452P            | katG_S315T                                                              | China | Zhang, H, et al. Nature genetics 45.10 (2013): 1255-1260. |
| SRR671807 | rpoB_S450L            | katG_S315T                                                              | China | Zhang, H, et al. Nature genetics 45.10 (2013): 1255-1260. |
| SRR671809 | rpoB_S450L            | katG_S315T                                                              | China | Zhang, H, et al. Nature genetics 45.10 (2013): 1255-1260. |
| SRR671810 | rpoB_H445F            | katG_S315N                                                              | China | Zhang, H, et al. Nature genetics 45.10 (2013): 1255-1260. |
| SRR671811 | rpoB_S450L            | katG_S315T                                                              | China | Zhang, H, et al. Nature genetics 45.10 (2013): 1255-1260. |
| SRR671812 | rpoB_S450L            | katG_S315T                                                              | China | Zhang, H, et al. Nature genetics 45.10 (2013): 1255-1260. |
| SRR671815 | rpoB_S450L            | katG_S315T,fabG1_pro<br>moter_T1673432G                                 | China | Zhang, H, et al. Nature genetics 45.10 (2013): 1255-1260. |
| SRR671816 | rpoB_H445D            | katG_S315T                                                              | China | Zhang, H, et al. Nature genetics 45.10 (2013): 1255-1260. |
| SRR671817 | rpoB_H445D            | katG_S315T                                                              | China | Zhang, H, et al. Nature genetics 45.10 (2013): 1255-1260. |
| SRR671818 | rpoB_S450L            | katG_S315T                                                              | China | Zhang, H, et al. Nature genetics 45.10 (2013): 1255-1260. |
| SRR671819 | rpoB_T427P,rpoB_L430P | katG_W191R,fabG1_pr<br>omoter_C1673425T,ah<br>pC_promoter_G27261<br>45A | China | Zhang, H, et al. Nature genetics 45.10 (2013): 1255-1260. |
| SRR671820 | rpoB_H445D            | katG_S315T                                                              | China | Zhang, H, et al. Nature genetics 45.10 (2013): 1255-1260. |
| SRR671821 | rpoB_S450L            | katG_S315T                                                              | China | Zhang, H, et al. Nature genetics 45.10 (2013): 1255-1260. |
| SRR671822 | rpoB_S450L            | katG_S315T                                                              | China | Zhang, H, et al. Nature genetics 45.10 (2013): 1255-1260. |
| SRR671824 | rpoB_S450L,rpoB_P454L | fabG1_promoter_C167<br>3425T                                            | China | Zhang, H, et al. Nature genetics 45.10 (2013): 1255-1260. |
| SRR671825 | rpoB_S450L            | katG_S315T                                                              | China | Zhang, H, et al. Nature genetics 45.10 (2013): 1255-1260. |
| SRR671826 | rpoB_S450L            | katG_T380I,ahpC_pro<br>moter_C2726139T,fab<br>G1_promoter_C16734<br>25T | China | Zhang, H, et al. Nature genetics 45.10 (2013): 1255-1260. |
| SRR671828 | rpoB_H445D            | katG_N138D,fabG1_pr<br>omoter_T1673432A                                 | China | Zhang, H, et al. Nature genetics 45.10 (2013): 1255-1260. |
| SRR671829 | rpoB_S450L            | katG_S315T                                                              | China | Zhang, H, et al. Nature genetics 45.10 (2013): 1255-1260. |
| SRR671831 | rpoB_S450L            | katG_S315T                                                              | China | Zhang, H, et al. Nature genetics 45.10 (2013): 1255-1260. |
| SRR671834 | rpoB_S450L            | katG_S315T                                                              | China | Zhang, H, et al. Nature genetics 45.10 (2013): 1255-1260. |
| SRR671837 | rpoB_S450L            | katG_S315T,ahpC_pro<br>moter_C2726141T                                  | China | Zhang, H, et al. Nature genetics 45.10 (2013): 1255-1260. |
| SRR671838 | rpoB_D435V            | katG_S315T                                                              | China | Zhang, H, et al. Nature genetics 45.10 (2013): 1255-1260. |
| SRR671839 | rpoB_H445Y            | katG_S315T,fabG1_pro<br>moter_T1673432A                                 | China | Zhang, H, et al. Nature genetics 45.10 (2013): 1255-1260. |
| SRR671840 | rpoB_H445Y            | katG_S315N                                                              | China | Zhang, H, et al. Nature genetics 45.10 (2013): 1255-1260. |
| SRR671841 | rpoB_H445N,rpoB_P454L | katG_S315T                                                              | China | Zhang, H, et al. Nature genetics 45.10 (2013): 1255-1260. |
| SRR671843 | rpoB_S450L            | katG_S315T                                                              | China | Zhang, H, et al. Nature genetics 45.10 (2013): 1255-1260. |
| SRR671844 | rpoB_S450L            | katG_S315T, katG_S315<br>R, katG_S315T                                  | China | Zhang, H, et al. Nature genetics 45.10 (2013): 1255-1260. |
| SRR671848 | rpoB_H445Y            | katG_W191R,fabG1_pr<br>omoter_C1673425T                                 | China | Zhang, H, et al. Nature genetics 45.10 (2013): 1255-1260. |
| SRR671849 | rpoB_S450L            | katG_S315T                                                              | China | Zhang, H, et al. Nature genetics 45.10 (2013): 1255-1260. |
| SRR671850 | rpoB_S450L            | katG_S315T                                                              | China | Zhang, H, et al. Nature genetics 45.10 (2013): 1255-1260. |
| SRR671851 | rpoB_L430P,rpoB_S431G | katG_S315T                                                              | China | Zhang, H, et al. Nature genetics 45.10 (2013): 1255-1260. |
| SRR671852 | rpoB_H445Y            | fabG1_promoter_C167<br>3425T                                            | China | Zhang, H, et al. Nature genetics 45.10 (2013): 1255-1260. |
| SRR671854 | rpoB_S441L            | katG_S315T                                                              | China | Zhang, H, et al. Nature genetics 45.10 (2013): 1255-1260. |
| SRR671855 | rpoB_S450L            | katG_S315T                                                              | China | Zhang, H, et al. Nature genetics 45.10 (2013): 1255-1260. |
| SRR671857 | rpoB_S450L            | katG_S315T                                                              | China | Zhang, H, et al. Nature genetics 45.10 (2013): 1255-1260. |
| SRR671861 | rpoB_S450L            | katG_S315N                                                              | China | Zhang, H, et al. Nature genetics 45.10 (2013): 1255-1260. |

|            |                        |                                                  |        |                                                                              |
|------------|------------------------|--------------------------------------------------|--------|------------------------------------------------------------------------------|
| SRR671862  | rpoB_S450L             | katG_S315N                                       | China  | Zhang, H, et al. Nature genetics 45.10 (2013): 1255-1260.                    |
| SRR671863  | rpoB_H445L             | katG_S315T                                       | China  | Zhang, H, et al. Nature genetics 45.10 (2013): 1255-1260.                    |
| SRR671864  | rpoB_H445L             | katG_S315T                                       | China  | Zhang, H, et al. Nature genetics 45.10 (2013): 1255-1260.                    |
| SRR671865  | rpoB_S450L             | katG_S315T                                       | China  | Zhang, H, et al. Nature genetics 45.10 (2013): 1255-1260.                    |
| SRR671866  | rpoB_S450L             | katG_S315T                                       | China  | Zhang, H, et al. Nature genetics 45.10 (2013): 1255-1260.                    |
| SRR671867  | rpoB_D435V             | katG_Y155C,fabG1_promoter_C1673425T              | China  | Zhang, H, et al. Nature genetics 45.10 (2013): 1255-1260.                    |
| SRR671868  | rpoB_S450L             | fabG1_promoter_C1673425T                         | China  | Zhang, H, et al. Nature genetics 45.10 (2013): 1255-1260.                    |
| SRR671869  | rpoB_H445N             | katG_S315G                                       | China  | Zhang, H, et al. Nature genetics 45.10 (2013): 1255-1260.                    |
| ERR550764  | rpoB_S450L             | katG_S315T                                       | German | Walker, T.M., et al. The Lancet infectious diseases 15.10 (2015): 1193-1202. |
| ERR551236  | rpoB_S450L             | katG_S315T                                       | German | Walker, T.M., et al. The Lancet infectious diseases 15.10 (2015): 1193-1202. |
| ERR552090  | rpoB_S450L             | katG_S315T                                       | German | Walker, T.M., et al. The Lancet infectious diseases 15.10 (2015): 1193-1202. |
| ERR552326  | rpoB_S450L             | katG_S315T, katG_I335V                           | German | Walker, T.M., et al. The Lancet infectious diseases 15.10 (2015): 1193-1202. |
| ERR552391  | rpoB_S450L             | katG_S315T                                       | German | Walker, T.M., et al. The Lancet infectious diseases 15.10 (2015): 1193-1202. |
| ERR552539  | rpoB_L452P             | katG_S315T                                       | German | Walker, T.M., et al. The Lancet infectious diseases 15.10 (2015): 1193-1202. |
| ERR551957  | rpoB_S450L             | katG_S315T, katG_I335V                           | German | Walker, T.M., et al. The Lancet infectious diseases 15.10 (2015): 1193-1202. |
| ERR036188  | rpoB_S450L             | katG_S315T                                       | Malawi | Guerra-Assunção, J. A., et al. Elife 4 (2015): e05166.                       |
| ERR037486  | rpoB_S450L             | katG_S315T                                       | Malawi | Guerra-Assunção, J. A., et al. Elife 4 (2015): e05166.                       |
| ERR1063841 | rpoB_S450L             | inhA_I194T, fabG1_promoter_C1673425T             | Malawi | Guerra-Assunção, J. A., et al. Elife 4 (2015): e05166.                       |
| ERR1063848 | rpoB_S450L             | katG_S315T                                       | Malawi | Guerra-Assunção, J. A., et al. Elife 4 (2015): e05166.                       |
| ERR1063850 | rpoB_D435V             | katG_S315T                                       | Malawi | Guerra-Assunção, J. A., et al. Elife 4 (2015): e05166.                       |
| ERR1063861 | rpoB_H445N, rpoB_E460G | inhA_S94A                                        | Malawi | Guerra-Assunção, J. A., et al. Elife 4 (2015): e05166.                       |
| ERR1063895 | rpoB_H445Y             | katG_S315T, fabG1_promoter_C1673425T             | Malawi | Guerra-Assunção, J. A., et al. Elife 4 (2015): e05166.                       |
| ERR161085  | rpoB_H445N             | inhA_S94A                                        | Malawi | Guerra-Assunção, J. A., et al. Elife 4 (2015): e05166.                       |
| ERR163953  | rpoB_D435V             | katG_S315T                                       | Malawi | Guerra-Assunção, J. A., et al. Elife 4 (2015): e05166.                       |
| ERR163958  | rpoB_S450L             | katG_S315T                                       | Malawi | Guerra-Assunção, J. A., et al. Elife 4 (2015): e05166.                       |
| ERR163962  | rpoB_H445N             | inhA_S94A                                        | Malawi | Guerra-Assunção, J. A., et al. Elife 4 (2015): e05166.                       |
| ERR176629  | rpoB_S450L             | katG_S315T                                       | Malawi | Guerra-Assunção, J. A., et al. Elife 4 (2015): e05166.                       |
| ERR181793  | rpoB_H445N             | inhA_S94A                                        | Malawi | Guerra-Assunção, J. A., et al. Elife 4 (2015): e05166.                       |
| ERR181861  | rpoB_S450L             | katG_S315T                                       | Malawi | Guerra-Assunção, J. A., et al. Elife 4 (2015): e05166.                       |
| ERR181930  | rpoB_H445N             | inhA_S94A                                        | Malawi | Guerra-Assunção, J. A., et al. Elife 4 (2015): e05166.                       |
| ERR181933  | rpoB_H445N             | inhA_S94A                                        | Malawi | Guerra-Assunção, J. A., et al. Elife 4 (2015): e05166.                       |
| ERR181986  | rpoB_S450L             | katG_S315T                                       | Malawi | Guerra-Assunção, J. A., et al. Elife 4 (2015): e05166.                       |
| ERR190370  | rpoB_S450L             | katG_S315T                                       | Malawi | Guerra-Assunção, J. A., et al. Elife 4 (2015): e05166.                       |
| ERR212021  | rpoB_S450L             | kasA_G269S, katG_S315T                           | Malawi | Guerra-Assunção, J. A., et al. Elife 4 (2015): e05166.                       |
| ERR212054  | rpoB_H445N             | inhA_S94A                                        | Malawi | Guerra-Assunção, J. A., et al. Elife 4 (2015): e05166.                       |
| ERR221596  | rpoB_H445N             | inhA_S94A                                        | Malawi | Guerra-Assunção, J. A., et al. Elife 4 (2015): e05166.                       |
| ERR221616  | rpoB_S450L             | katG_S315T                                       | Malawi | Guerra-Assunção, J. A., et al. Elife 4 (2015): e05166.                       |
| ERR221617  | rpoB_S450L             | katG_S315T                                       | Malawi | Guerra-Assunção, J. A., et al. Elife 4 (2015): e05166.                       |
| ERR221618  | rpoB_S450L             | katG_S315T                                       | Malawi | Guerra-Assunção, J. A., et al. Elife 4 (2015): e05166.                       |
| ERR245651  | rpoB_H445N             | inhA_S94A                                        | Malawi | Guerra-Assunção, J. A., et al. Elife 4 (2015): e05166.                       |
| ERR245670  | rpoB_H445N             | inhA_S94A                                        | Malawi | Guerra-Assunção, J. A., et al. Elife 4 (2015): e05166.                       |
| ERR245829  | rpoB_H445N             | inhA_S94A                                        | Malawi | Guerra-Assunção, J. A., et al. Elife 4 (2015): e05166.                       |
| ERR245836  | rpoB_H445N             | inhA_S94A                                        | Malawi | Guerra-Assunção, J. A., et al. Elife 4 (2015): e05166.                       |
| ERR473327  | rpoB_D435G, rpoB_L452P | kasA_G269S, katG_S315T, fabG1_promoter_T1673432A | Malawi | Guerra-Assunção, J. A., et al. Elife 4 (2015): e05166.                       |
| ERR736807  | rpoB_H445N             | inhA_S94A                                        | Malawi | Guerra-Assunção, J. A., et al. Elife 4 (2015): e05166.                       |
| ERR736820  | rpoB_H445N             | inhA_S94A                                        | Malawi | Guerra-Assunção, J. A., et al. Elife 4 (2015): e05166.                       |
| ERR773802  | rpoB_H445N             | inhA_S94A                                        | Malawi | Guerra-Assunção, J. A., et al. Elife 4 (2015): e05166.                       |
| ERR779679  | rpoB_H445N             | inhA_S94A                                        | Malawi | Guerra-Assunção, J. A., et al. Elife 4 (2015): e05166.                       |
| SRS485049  | rpoB_S450L             | inhA_V78A, katG_S315I                            | Mali   | Winglee, K, et al. PLoS neglected tropical diseases 10.1 (2016): e0004332.   |
| SRS485073  | rpoB_L452P             | katG_S315T                                       | Mali   | Winglee, K, et al. PLoS neglected tropical diseases 10.1 (2016): e0004332.   |
| SRS485074  | rpoB_S450L             | katG_S315T                                       | Mali   | Winglee, K, et al. PLoS neglected tropical diseases 10.1 (2016): e0004332.   |
| SRS485075  | rpoB_D435V             | katG_S315T                                       | Mali   | Winglee, K, et al. PLoS neglected tropical diseases 10.1 (2016): e0004332.   |
| SRS485076  | rpoB_D435V             | katG_S315T                                       | Mali   | Winglee, K, et al. PLoS neglected tropical diseases 10.1 (2016): e0004332.   |
| SRS485077  | rpoB_S450L             | inhA_I21T, fabG1_promoter_C1673425T              | Mali   | Winglee, K, et al. PLoS neglected tropical diseases 10.1 (2016): e0004332.   |
| SRS485078  | rpoB_L452P             | katG_S315T                                       | Mali   | Winglee, K, et al. PLoS neglected tropical diseases 10.1 (2016): e0004332.   |
| SRS485079  | rpoB_D435V             | katG_S315T                                       | Mali   | Winglee, K, et al. PLoS neglected tropical diseases 10.1 (2016): e0004332.   |



|           |                                    |                                      |             |                                                                            |
|-----------|------------------------------------|--------------------------------------|-------------|----------------------------------------------------------------------------|
| SRS485080 | rpoB_L452P                         | katG_S315T                           | Mali        | Winglee, K, et al. PLoS neglected tropical diseases 10.1 (2016): e0004332. |
| SRS485083 | rpoB_S450L                         | katG_S315T                           | Mali        | Winglee, K, et al. PLoS neglected tropical diseases 10.1 (2016): e0004332. |
| SRS485085 | rpoB_H445D                         | katG_S315T                           | Mali        | Winglee, K, et al. PLoS neglected tropical diseases 10.1 (2016): e0004332. |
| SRS485086 | rpoB_D435V                         | inhA_S94A, katG_S315T                | Mali        | Winglee, K, et al. PLoS neglected tropical diseases 10.1 (2016): e0004332. |
| SRS485087 | rpoB_H445D                         | katG_S315T                           | Mali        | Winglee, K, et al. PLoS neglected tropical diseases 10.1 (2016): e0004332. |
| SRS485088 | rpoB_D435V                         | katG_S315T                           | Mali        | Winglee, K, et al. PLoS neglected tropical diseases 10.1 (2016): e0004332. |
| SRS485089 | rpoB_S450L                         | katG_S315T                           | Mali        | Winglee, K, et al. PLoS neglected tropical diseases 10.1 (2016): e0004332. |
| SRS485090 | rpoB_D435V                         | katG_S315T                           | Mali        | Winglee, K, et al. PLoS neglected tropical diseases 10.1 (2016): e0004332. |
| SRS485092 | rpoB_D435V                         | katG_S315T, fabG1_promoter_T1673432C | Mali        | Winglee, K, et al. PLoS neglected tropical diseases 10.1 (2016): e0004332. |
| SRS485093 | rpoB_S450L                         | fabG1_promoter_C1673425T             | Mali        | Winglee, K, et al. PLoS neglected tropical diseases 10.1 (2016): e0004332. |
| SRS485094 | rpoB_H445D                         | katG_S315T, fabG1_promoter_T1673432C | Mali        | Winglee, K, et al. PLoS neglected tropical diseases 10.1 (2016): e0004332. |
| SRS485095 | rpoB_D435V                         | katG_S315T                           | Mali        | Winglee, K, et al. PLoS neglected tropical diseases 10.1 (2016): e0004332. |
| SRS485096 | rpoB_H445Q, rpoB_L452P             | katG_S315T                           | Mali        | Winglee, K, et al. PLoS neglected tropical diseases 10.1 (2016): e0004332. |
| SRS485097 | rpoB_H445D                         | katG_S315T, fabG1_promoter_T1673432C | Mali        | Winglee, K, et al. PLoS neglected tropical diseases 10.1 (2016): e0004332. |
| SRS485098 | rpoB_D435E, rpoB_S441L             | katG_S315T                           | Mali        | Winglee, K, et al. PLoS neglected tropical diseases 10.1 (2016): e0004332. |
| SRS485099 | rpoB_S450L                         | katG_S315T                           | Mali        | Winglee, K, et al. PLoS neglected tropical diseases 10.1 (2016): e0004332. |
| SRS526835 | rpoB_H445L                         | katG_S315T, fabG1_promoter_T1673432C | Mali        | Winglee, K, et al. PLoS neglected tropical diseases 10.1 (2016): e0004332. |
| SRS526842 | rpoB_D435F                         | inhA_V78A, katG_S315T                | Mali        | Winglee, K, et al. PLoS neglected tropical diseases 10.1 (2016): e0004332. |
| SRS526897 | rpoB_S450L                         | katG_W328L                           | Mali        | Winglee, K, et al. PLoS neglected tropical diseases 10.1 (2016): e0004332. |
| SRS526924 | rpoB_D435V                         | katG_S315T, fabG1_promoter_T1673432C | Mali        | Winglee, K, et al. PLoS neglected tropical diseases 10.1 (2016): e0004332. |
| SRS526927 | rpoB_S450L                         | katG_S315T                           | Mali        | Winglee, K, et al. PLoS neglected tropical diseases 10.1 (2016): e0004332. |
| SRS526934 | rpoB_H445D                         | katG_S315T, fabG1_promoter_T1673432C | Mali        | Winglee, K, et al. PLoS neglected tropical diseases 10.1 (2016): e0004332. |
| SRS526977 | rpoB_S450L                         | katG_S315T, fabG1_promoter_C1673425T | Mali        | Winglee, K, et al. PLoS neglected tropical diseases 10.1 (2016): e0004332. |
| SRS526988 | rpoB_H445R                         | katG_S315T                           | Mali        | Winglee, K, et al. PLoS neglected tropical diseases 10.1 (2016): e0004332. |
| SRS703247 | rpoB_S450L                         | katG_S315T                           | Mali        | Winglee, K, et al. PLoS neglected tropical diseases 10.1 (2016): e0004332. |
| SRS703250 | rpoB_D435V                         | katG_S315T                           | Mali        | Winglee, K, et al. PLoS neglected tropical diseases 10.1 (2016): e0004332. |
| SRS703269 | rpoB_S450L                         | inhA_V78A, katG_S315T                | Mali        | Winglee, K, et al. PLoS neglected tropical diseases 10.1 (2016): e0004332. |
| ERR024350 | rpoB_S450L                         | katG_S315T                           | Netherlands | Bryant, J.M., et al. BMC infectious diseases 13.1 (2013): 110.             |
| ERR024351 | rpoB_S450L                         | katG_S315T                           | Netherlands | Bryant, J.M., et al. BMC infectious diseases 13.1 (2013): 110.             |
| ERR015610 | rpoB_S450L                         | katG_S315T                           | Russia      | Casali, N, et al. Nature genetics 46.3 (2014): 279-286.                    |
| ERR015611 | rpoB_S450L                         | katG_S315T                           | Russia      | Casali, N, et al. Nature genetics 46.3 (2014): 279-286.                    |
| ERR015614 | rpoB_S450L                         | katG_S315T                           | Russia      | Casali, N, et al. Nature genetics 46.3 (2014): 279-286.                    |
| ERR015616 | rpoB_L430P, rpoB_S431G, rpoB_H445Q | katG_S315T                           | Russia      | Casali, N, et al. Nature genetics 46.3 (2014): 279-286.                    |
| ERR047880 | rpoB_S450L                         | katG_S315T, fabG1_promoter_C1673425T | Russia      | Casali, N, et al. Nature genetics 46.3 (2014): 279-286.                    |
| ERR047881 | rpoB_S450L                         | kasA_G269S, katG_S315T               | Russia      | Casali, N, et al. Nature genetics 46.3 (2014): 279-286.                    |
| ERR047882 | rpoB_H445Y                         | katG_S315T, fabG1_promoter_T1673432C | Russia      | Casali, N, et al. Nature genetics 46.3 (2014): 279-286.                    |
| ERR047883 | rpoB_S450L                         | kasA_G269S, katG_S315T               | Russia      | Casali, N, et al. Nature genetics 46.3 (2014): 279-286.                    |
| ERR047884 | rpoB_S450L                         | katG_S315T, fabG1_promoter_C1673425T | Russia      | Casali, N, et al. Nature genetics 46.3 (2014): 279-286.                    |
| ERR047885 | rpoB_H445Y                         | katG_S315T, fabG1_promoter_T1673432C | Russia      | Casali, N, et al. Nature genetics 46.3 (2014): 279-286.                    |
| ERR047886 | rpoB_L452P                         | katG_S315T                           | Russia      | Casali, N, et al. Nature genetics 46.3 (2014): 279-286.                    |
| ERR047887 | rpoB_H445Y                         | katG_S315T, fabG1_promoter_T1673432C | Russia      | Casali, N, et al. Nature genetics 46.3 (2014): 279-286.                    |
| ERR047888 | rpoB_H445Y                         | katG_S315T, fabG1_promoter_T1673432C | Russia      | Casali, N, et al. Nature genetics 46.3 (2014): 279-286.                    |
| ERR047889 | rpoB_H445Y                         | katG_S315T, fabG1_promoter_T1673432C | Russia      | Casali, N, et al. Nature genetics 46.3 (2014): 279-286.                    |
| ERR047890 | rpoB_H445Y                         | katG_S315T, fabG1_promoter_T1673432C | Russia      | Casali, N, et al. Nature genetics 46.3 (2014): 279-286.                    |
| ERR047891 | rpoB_L452P                         | katG_S315T                           | Russia      | Casali, N, et al. Nature genetics 46.3 (2014): 279-286.                    |
| ERR067576 | rpoB_S450L                         | katG_S315T                           | Russia      | Casali, N, et al. Nature genetics 46.3 (2014): 279-286.                    |
| ERR067577 | rpoB_S450L                         | katG_S315T                           | Russia      | Casali, N, et al. Nature genetics 46.3 (2014): 279-286.                    |
| ERR067578 | rpoB_S450L                         | katG_S315T                           | Russia      | Casali, N, et al. Nature genetics 46.3 (2014): 279-286.                    |

























|            |                       |                                                  |              |                                                          |
|------------|-----------------------|--------------------------------------------------|--------------|----------------------------------------------------------|
| SRR1062841 | rpoB_S450L            | katG_S315T,fabG1_promoter_C1673425T              | South Africa | Cohen, K.A., et al. PLoS medicine 12.9 (2015): e1001880. |
| SRR1062842 | rpoB_D435G,rpoB_L452P | kasA_G269S, katG_S315T, fabG1_promoter_T1673432A | South Africa | Cohen, K.A., et al. PLoS medicine 12.9 (2015): e1001880. |
| SRR1062843 | rpoB_D435G,rpoB_L452P | kasA_G269S, katG_S315T, fabG1_promoter_T1673432A | South Africa | Cohen, K.A., et al. PLoS medicine 12.9 (2015): e1001880. |
| SRR1062844 | rpoB_D435G,rpoB_L452P | kasA_G269S, katG_S315T, fabG1_promoter_T1673432A | South Africa | Cohen, K.A., et al. PLoS medicine 12.9 (2015): e1001880. |
| SRR1062845 | rpoB_S450L            | inhA_I194T, fabG1_promoter_C1673425T             | South Africa | Cohen, K.A., et al. PLoS medicine 12.9 (2015): e1001880. |
| SRR1062846 | rpoB_D435G,rpoB_L452P | kasA_G269S, katG_S315T, fabG1_promoter_T1673432A | South Africa | Cohen, K.A., et al. PLoS medicine 12.9 (2015): e1001880. |
| SRR1062847 | rpoB_S450L            | kasA_G269S, katG_S315T, ahpC_promoter_C2726141T  | South Africa | Cohen, K.A., et al. PLoS medicine 12.9 (2015): e1001880. |
| SRR1062848 | rpoB_D435V            | katG_S315T                                       | South Africa | Cohen, K.A., et al. PLoS medicine 12.9 (2015): e1001880. |
| SRR1062849 | rpoB_S450L            | inhA_I194T, fabG1_promoter_C1673425T             | South Africa | Cohen, K.A., et al. PLoS medicine 12.9 (2015): e1001880. |
| SRR1062850 | rpoB_S450L            | katG_S315T                                       | South Africa | Cohen, K.A., et al. PLoS medicine 12.9 (2015): e1001880. |
| SRR1062851 | rpoB_S450L            | katG_S315T                                       | South Africa | Cohen, K.A., et al. PLoS medicine 12.9 (2015): e1001880. |
| SRR1062852 | rpoB_S450L            | katG_S315T                                       | South Africa | Cohen, K.A., et al. PLoS medicine 12.9 (2015): e1001880. |
| SRR1062853 | rpoB_S450L            | inhA_I194T, fabG1_promoter_C1673425T             | South Africa | Cohen, K.A., et al. PLoS medicine 12.9 (2015): e1001880. |
| SRR1062854 | rpoB_S450L            | kasA_G269S, katG_S315T, ahpC_promoter_C2726141T  | South Africa | Cohen, K.A., et al. PLoS medicine 12.9 (2015): e1001880. |
| SRR1062855 | rpoB_S450W            | kasA_G269S, katG_S315T                           | South Africa | Cohen, K.A., et al. PLoS medicine 12.9 (2015): e1001880. |
| SRR1062856 | rpoB_S450L            | fabG1_promoter_C1673425T                         | South Africa | Cohen, K.A., et al. PLoS medicine 12.9 (2015): e1001880. |
| SRR1140898 | rpoB_L430P            | katG_S315T                                       | South Africa | Cohen, K.A., et al. PLoS medicine 12.9 (2015): e1001880. |
| SRR1140899 | rpoB_S450L            | inhA_I21T, fabG1_promoter_C1673425T              | South Africa | Cohen, K.A., et al. PLoS medicine 12.9 (2015): e1001880. |
| SRR1140901 | rpoB_Q429H,rpoB_D435Y | ahpC_promoter_C2726141T                          | South Africa | Cohen, K.A., et al. PLoS medicine 12.9 (2015): e1001880. |
| SRR1140916 | rpoB_S450L            | katG_S315T                                       | South Africa | Cohen, K.A., et al. PLoS medicine 12.9 (2015): e1001880. |
| SRR1140924 | rpoB_S450L            | inhA_I21T, fabG1_promoter_C1673425T              | South Africa | Cohen, K.A., et al. PLoS medicine 12.9 (2015): e1001880. |
| SRR1140926 | rpoB_S450L            | katG_S315T                                       | South Africa | Cohen, K.A., et al. PLoS medicine 12.9 (2015): e1001880. |
| SRR1140929 | rpoB_S450L            | katG_S315T                                       | South Africa | Cohen, K.A., et al. PLoS medicine 12.9 (2015): e1001880. |
| SRR1140930 | rpoB_L430P            | katG_S315T                                       | South Africa | Cohen, K.A., et al. PLoS medicine 12.9 (2015): e1001880. |
| SRR1140932 | rpoB_L452P            | kasA_G269S, katG_S315T, fabG1_promoter_T1673432A | South Africa | Cohen, K.A., et al. PLoS medicine 12.9 (2015): e1001880. |
| SRR1140934 | rpoB_S450L            | katG_S315T                                       | South Africa | Cohen, K.A., et al. PLoS medicine 12.9 (2015): e1001880. |
| SRR1140936 | rpoB_S450L            | katG_S315T                                       | South Africa | Cohen, K.A., et al. PLoS medicine 12.9 (2015): e1001880. |
| SRR1140938 | rpoB_D435Y            | katG_S315T, fabG1_promoter_C1673425T             | South Africa | Cohen, K.A., et al. PLoS medicine 12.9 (2015): e1001880. |
| SRR1140941 | rpoB_S450L            | katG_S315T                                       | South Africa | Cohen, K.A., et al. PLoS medicine 12.9 (2015): e1001880. |
| SRR1140943 | rpoB_H445L            | katG_S315T                                       | South Africa | Cohen, K.A., et al. PLoS medicine 12.9 (2015): e1001880. |
| SRR1140944 | rpoB_L430P,rpoB_D435Y | kasA_G269S, katG_S315T, ahpC_promoter_C2726141T  | South Africa | Cohen, K.A., et al. PLoS medicine 12.9 (2015): e1001880. |
| SRR1140945 | rpoB_S450L            | katG_S315T                                       | South Africa | Cohen, K.A., et al. PLoS medicine 12.9 (2015): e1001880. |
| SRR1140946 | rpoB_S450L            | kasA_G269S, katG_S315T, ahpC_promoter_C2726141T  | South Africa | Cohen, K.A., et al. PLoS medicine 12.9 (2015): e1001880. |
| SRR1140947 | rpoB_S450L            | katG_S315T                                       | South Africa | Cohen, K.A., et al. PLoS medicine 12.9 (2015): e1001880. |
| SRR1140949 | rpoB_I491F            | kasA_G269S, katG_S315T, fabG1_promoter_T1673432A | South Africa | Cohen, K.A., et al. PLoS medicine 12.9 (2015): e1001880. |
| SRR1140951 | rpoB_S450L            | katG_S315T, fabG1_promoter_C1673425T             | South Africa | Cohen, K.A., et al. PLoS medicine 12.9 (2015): e1001880. |
| SRR1140952 | rpoB_H445G            | katG_D419H, fabG1_promoter_C1673425T             | South Africa | Cohen, K.A., et al. PLoS medicine 12.9 (2015): e1001880. |











|            |                       |                                                  |              |                                                                              |
|------------|-----------------------|--------------------------------------------------|--------------|------------------------------------------------------------------------------|
| SRR847798  | rpoB_S450W            | katG_S315T                                       | South Africa | Cohen, K.A., et al. PLoS medicine 12.9 (2015): e1001880.                     |
| SRR847799  | rpoB_D435V            | katG_S315T,fabG1_promoter_G1673423T              | South Africa | Cohen, K.A., et al. PLoS medicine 12.9 (2015): e1001880.                     |
| SRR847800  | rpoB_D435G,rpoB_L452P | kasA_G269S, katG_S315T, fabG1_promoter_T1673432A | South Africa | Cohen, K.A., et al. PLoS medicine 12.9 (2015): e1001880.                     |
| SRR847801  | rpoB_D435G,rpoB_L452P | kasA_G269S, katG_S315T, fabG1_promoter_T1673432A | South Africa | Cohen, K.A., et al. PLoS medicine 12.9 (2015): e1001880.                     |
| SRR847802  | rpoB_S450L            | katG_S315T                                       | South Africa | Cohen, K.A., et al. PLoS medicine 12.9 (2015): e1001880.                     |
| SRR847803  | rpoB_S450L            | katG_S315T                                       | South Africa | Cohen, K.A., et al. PLoS medicine 12.9 (2015): e1001880.                     |
| SRR924205  | rpoB_D435G,rpoB_L452P | kasA_G269S, katG_S315T, fabG1_promoter_T1673432A | South Africa | Cohen, K.A., et al. PLoS medicine 12.9 (2015): e1001880.                     |
| SRR924206  | rpoB_D435G,rpoB_L452P | kasA_G269S, katG_S315T, fabG1_promoter_T1673432A | South Africa | Cohen, K.A., et al. PLoS medicine 12.9 (2015): e1001880.                     |
| SRR924210  | rpoB_S450L            | fabG1_promoter_C1673425T                         | South Africa | Cohen, K.A., et al. PLoS medicine 12.9 (2015): e1001880.                     |
| SRR924211  | rpoB_L452P            | katG_S315T, fabG1_promoter_T1673432A             | South Africa | Cohen, K.A., et al. PLoS medicine 12.9 (2015): e1001880.                     |
| SRR924212  | rpoB_D435G,rpoB_L452P | kasA_G269S, katG_S315T, fabG1_promoter_T1673432A | South Africa | Cohen, K.A., et al. PLoS medicine 12.9 (2015): e1001880.                     |
| SRR924214  | rpoB_L452P            | kasA_G269S, katG_S315T, fabG1_promoter_T1673432A | South Africa | Cohen, K.A., et al. PLoS medicine 12.9 (2015): e1001880.                     |
| SRR924219  | rpoB_D435G,rpoB_L452P | kasA_G269S, katG_S315T, fabG1_promoter_T1673432A | South Africa | Cohen, K.A., et al. PLoS medicine 12.9 (2015): e1001880.                     |
| SRR924224  | rpoB_S450L            | kasA_G269S, katG_S315T, ahpC_promoter_C2726141T  | South Africa | Cohen, K.A., et al. PLoS medicine 12.9 (2015): e1001880.                     |
| SRR924225  | rpoB_D435G,rpoB_L452P | kasA_G269S, katG_S315T, fabG1_promoter_T1673432A | South Africa | Cohen, K.A., et al. PLoS medicine 12.9 (2015): e1001880.                     |
| SRR924226  | rpoB_D435G,rpoB_L452P | katG_S315T, fabG1_promoter_T1673432A             | South Africa | Cohen, K.A., et al. PLoS medicine 12.9 (2015): e1001880.                     |
| SRR924227  | rpoB_D435G,rpoB_L452P | kasA_G269S, katG_S315T, fabG1_promoter_T1673432A | South Africa | Cohen, K.A., et al. PLoS medicine 12.9 (2015): e1001880.                     |
| SRR924231  | rpoB_D435G,rpoB_L452P | kasA_G269S, katG_S315T, fabG1_promoter_T1673432A | South Africa | Cohen, K.A., et al. PLoS medicine 12.9 (2015): e1001880.                     |
| SRR924232  | rpoB_D435G,rpoB_L452P | kasA_G269S, katG_S315T, fabG1_promoter_T1673432A | South Africa | Cohen, K.A., et al. PLoS medicine 12.9 (2015): e1001880.                     |
| SRR924233  | rpoB_S450L            | kasA_G269S, katG_S315T, ahpC_promoter_C2726141T  | South Africa | Cohen, K.A., et al. PLoS medicine 12.9 (2015): e1001880.                     |
| SRR924234  | rpoB_D435G,rpoB_L452P | kasA_G269S, katG_S315T, fabG1_promoter_T1673432A | South Africa | Cohen, K.A., et al. PLoS medicine 12.9 (2015): e1001880.                     |
| SRR924240  | rpoB_S450L            | katG_S315T                                       | South Africa | Cohen, K.A., et al. PLoS medicine 12.9 (2015): e1001880.                     |
| SRR924692  | rpoB_D435G,rpoB_L452P | kasA_G269S, katG_S315T, fabG1_promoter_T1673432A | South Africa | Cohen, K.A., et al. PLoS medicine 12.9 (2015): e1001880.                     |
| SRR924694  | rpoB_D435G,rpoB_L452P | kasA_G269S, katG_S315T, fabG1_promoter_T1673432A | South Africa | Cohen, K.A., et al. PLoS medicine 12.9 (2015): e1001880.                     |
| SRR924696  | rpoB_L452P            | kasA_G269S, katG_S315T, fabG1_promoter_T1673432A | South Africa | Cohen, K.A., et al. PLoS medicine 12.9 (2015): e1001880.                     |
| SRR924697  | rpoB_D435G,rpoB_L452P | kasA_G269S, katG_S315T, fabG1_promoter_T1673432A | South Africa | Cohen, K.A., et al. PLoS medicine 12.9 (2015): e1001880.                     |
| SRR958195  | rpoB_L452P            | kasA_G269S, katG_S315T, fabG1_promoter_T1673432A | South Africa | Cohen, K.A., et al. PLoS medicine 12.9 (2015): e1001880.                     |
| SRR2101307 | rpoB_H445D            | katG_S315T                                       | South Africa | Walker, T.M., et al. The Lancet infectious diseases 15.10 (2015): 1193-1202. |
| SRR2101344 | rpoB_D435V            | katG_S315T, fabG1_promoter_G1673423T             | South Africa | Walker, T.M., et al. The Lancet infectious diseases 15.10 (2015): 1193-1202. |

|            |                                    |                                                  |              |                                                                              |
|------------|------------------------------------|--------------------------------------------------|--------------|------------------------------------------------------------------------------|
| SRR2101373 | rpoB_S450L                         | inhA_S94A                                        | South Africa | Walker, T.M., et al. The Lancet infectious diseases 15.10 (2015): 1193-1202. |
| SRR2101384 | rpoB_S450L                         | katG_S315T                                       | South Africa | Walker, T.M., et al. The Lancet infectious diseases 15.10 (2015): 1193-1202. |
| SRR2101460 | rpoB_S450L                         | fabG1_promoter_C1673425T                         | South Africa | Walker, T.M., et al. The Lancet infectious diseases 15.10 (2015): 1193-1202. |
| SRR2101470 | rpoB_S450L                         | fabG1_promoter_C1673425T                         | South Africa | Walker, T.M., et al. The Lancet infectious diseases 15.10 (2015): 1193-1202. |
| SRR2101482 | rpoB_H445Y                         | katG_S315T, fabG1_promoter_C1673425T             | South Africa | Walker, T.M., et al. The Lancet infectious diseases 15.10 (2015): 1193-1202. |
| SRR2101505 | rpoB_S450L                         | katG_S315T                                       | South Africa | Walker, T.M., et al. The Lancet infectious diseases 15.10 (2015): 1193-1202. |
| SRR2101539 | rpoB_L452P                         | kasA_G269S, katG_S315T, fabG1_promoter_T1673432A | South Africa | Walker, T.M., et al. The Lancet infectious diseases 15.10 (2015): 1193-1202. |
| SRR2101574 | rpoB_H445Y                         | katG_S315T, fabG1_promoter_C1673425T             | South Africa | Walker, T.M., et al. The Lancet infectious diseases 15.10 (2015): 1193-1202. |
| SRR2101686 | rpoB_L430P                         | kasA_G269S, katG_S315T                           | South Africa | Walker, T.M., et al. The Lancet infectious diseases 15.10 (2015): 1193-1202. |
| SRR2101690 | rpoB_F433L, rpoB_M434I, rpoB_D435H | katG_S315T                                       | South Africa | Walker, T.M., et al. The Lancet infectious diseases 15.10 (2015): 1193-1202. |
| SRR2101731 | rpoB_S450L                         | katG_S315T                                       | South Africa | Walker, T.M., et al. The Lancet infectious diseases 15.10 (2015): 1193-1202. |
| SRR2101757 | rpoB_S450L                         | inhA_I194T                                       | South Africa | Walker, T.M., et al. The Lancet infectious diseases 15.10 (2015): 1193-1202. |
| SRR2101763 | rpoB_S450L                         | inhA_I194T                                       | South Africa | Walker, T.M., et al. The Lancet infectious diseases 15.10 (2015): 1193-1202. |
| SRR2101806 | rpoB_H445D                         | katG_S315T                                       | South Africa | Walker, T.M., et al. The Lancet infectious diseases 15.10 (2015): 1193-1202. |
| ERR970445  | rpoB_S450L                         | fabG1_promoter_C1673425T                         | South Africa | Black, P. A., et al. BMC genomics 16.1 (2015): 857.                          |
| ERR970447  | rpoB_S450L                         | fabG1_promoter_C1673425T                         | South Africa | Black, P. A., et al. BMC genomics 16.1 (2015): 857.                          |
| ERR972795  | rpoB_S450L                         | fabG1_promoter_C1673425T                         | South Africa | Black, P. A., et al. BMC genomics 16.1 (2015): 857.                          |
| ERR983252  | rpoB_S450L                         | fabG1_promoter_C1673425T                         | South Africa | Black, P. A., et al. BMC genomics 16.1 (2015): 857.                          |
| ERR983253  | rpoB_S450L                         | fabG1_promoter_C1673425T                         | South Africa | Black, P. A., et al. BMC genomics 16.1 (2015): 857.                          |
| ERR983254  | rpoB_S450L                         | fabG1_promoter_C1673425T                         | South Africa | Black, P. A., et al. BMC genomics 16.1 (2015): 857.                          |
| ERR550665  | rpoB_S450L                         | katG_S315T                                       | Sierra Leone | Walker, T.M., et al. The Lancet infectious diseases 15.10 (2015): 1193-1202. |
| ERR551126  | rpoB_S450L                         | katG_S315T                                       | Sierra Leone | Walker, T.M., et al. The Lancet infectious diseases 15.10 (2015): 1193-1202. |
| ERR551513  | rpoB_S450L                         | katG_S315T                                       | Sierra Leone | Walker, T.M., et al. The Lancet infectious diseases 15.10 (2015): 1193-1202. |
| ERR551620  | rpoB_D435Y                         | ahpC_promoter_G2726119A                          | Sierra Leone | Walker, T.M., et al. The Lancet infectious diseases 15.10 (2015): 1193-1202. |
| ERR552260  | rpoB_D435Y                         | kasA_G269S, katG_S315T                           | Sierra Leone | Walker, T.M., et al. The Lancet infectious diseases 15.10 (2015): 1193-1202. |
| ERR552662  | rpoB_S450L                         | katG_S315T                                       | Sierra Leone | Walker, T.M., et al. The Lancet infectious diseases 15.10 (2015): 1193-1202. |
| ERR552979  | rpoB_S450L                         | katG_S315T                                       | Sierra Leone | Walker, T.M., et al. The Lancet infectious diseases 15.10 (2015): 1193-1202. |
| ERR553000  | rpoB_H445Y                         | inhA_V78A, katG_S315T, ahpC_promoter_C2726141T   | Sierra Leone | Walker, T.M., et al. The Lancet infectious diseases 15.10 (2015): 1193-1202. |
| ERR553037  | rpoB_H445Y                         | katG_S315T                                       | Sierra Leone | Walker, T.M., et al. The Lancet infectious diseases 15.10 (2015): 1193-1202. |
| ERR553226  | rpoB_S450L                         | ahpC_promoter_C2726112T                          | Sierra Leone | Walker, T.M., et al. The Lancet infectious diseases 15.10 (2015): 1193-1202. |
| ERR464719  | rpoB_H445Y                         | katG_S315T                                       | Switzerland  | Bryant, J.M., et al. BMC infectious diseases 13.1 (2013): 110.               |
| ERR464729  | rpoB_D435Y                         | katG_S315N                                       | Switzerland  | Bryant, J.M., et al. BMC infectious diseases 13.1 (2013): 110.               |
| ERR464730  | rpoB_D435Y                         | katG_S315N                                       | Switzerland  | Bryant, J.M., et al. BMC infectious diseases 13.1 (2013): 110.               |
| SRR2100131 | rpoB_L452P                         | katG_S315T                                       | UK           | Walker, T.M., et al. The Lancet infectious diseases 15.10 (2015): 1193-1202. |
| SRR2100132 | rpoB_L452P                         | katG_S315T                                       | UK           | Walker, T.M., et al. The Lancet infectious diseases 15.10 (2015): 1193-1202. |
| ERR046786  | rpoB_I491F                         | katG_V473F                                       | UK           | Walker, T.M., et al. The Lancet infectious diseases 13.2 (2013): 137-146.    |
| ERR046796  | rpoB_L452P                         | katG_S315T                                       | UK           | Walker, T.M., et al. The Lancet infectious diseases 13.2 (2013): 137-146.    |
| ERR046821  | rpoB_L452P                         | katG_S315T                                       | UK           | Walker, T.M., et al. The Lancet infectious diseases 13.2 (2013): 137-146.    |
| ERR046855  | rpoB_H445Y                         | katG_S315T                                       | UK           | Walker, T.M., et al. The Lancet infectious diseases 13.2 (2013): 137-146.    |
| ERR046903  | rpoB_L452P                         | katG_S315T                                       | UK           | Walker, T.M., et al. The Lancet infectious diseases 13.2 (2013): 137-146.    |
| ERR046933  | rpoB_V170F                         | inhA_S94A                                        | UK           | Walker, T.M., et al. The Lancet infectious diseases 13.2 (2013): 137-146.    |
| SRR2100176 | rpoB_H445N                         | katG_S315T                                       | UK           | Walker, T.M., et al. The Lancet infectious diseases 15.10 (2015): 1193-1202. |
| SRR2100228 | rpoB_D435Y                         | katG_S315T                                       | UK           | Walker, T.M., et al. The Lancet infectious diseases 15.10 (2015): 1193-1202. |
| SRR2100231 | rpoB_S450L                         | katG_S315T                                       | UK           | Walker, T.M., et al. The Lancet infectious diseases 15.10 (2015): 1193-1202. |
| SRR2100234 | rpoB_H445D                         | katG_S315T                                       | UK           | Walker, T.M., et al. The Lancet infectious diseases 15.10 (2015): 1193-1202. |
| SRR2100238 | rpoB_S450L                         | fabG1_promoter_C1673425T                         | UK           | Walker, T.M., et al. The Lancet infectious diseases 15.10 (2015): 1193-1202. |
| SRR2100246 | rpoB_S450L                         | katG_S315T                                       | UK           | Walker, T.M., et al. The Lancet infectious diseases 15.10 (2015): 1193-1202. |
| SRR2100250 | rpoB_H445Y                         | katG_S315T                                       | UK           | Walker, T.M., et al. The Lancet infectious diseases 15.10 (2015): 1193-1202. |
| SRR2100257 | rpoB_S450L                         | katG_S315T                                       | UK           | Walker, T.M., et al. The Lancet infectious diseases 15.10 (2015): 1193-1202. |













|           |            |                                      |            |                                                                              |
|-----------|------------|--------------------------------------|------------|------------------------------------------------------------------------------|
| ERR552931 | rpoB_D435V | katG_S315T                           | Uzbekistan | Walker, T.M., et al. The Lancet infectious diseases 15.10 (2015): 1193-1202. |
| ERR552940 | rpoB_S450L | katG_S315T                           | Uzbekistan | Walker, T.M., et al. The Lancet infectious diseases 15.10 (2015): 1193-1202. |
| ERR552950 | rpoB_S450L | katG_S315T                           | Uzbekistan | Walker, T.M., et al. The Lancet infectious diseases 15.10 (2015): 1193-1202. |
| ERR552955 | rpoB_S450L | katG_S315T                           | Uzbekistan | Walker, T.M., et al. The Lancet infectious diseases 15.10 (2015): 1193-1202. |
| ERR552978 | rpoB_S450L | katG_S315T                           | Uzbekistan | Walker, T.M., et al. The Lancet infectious diseases 15.10 (2015): 1193-1202. |
| ERR552982 | rpoB_S450L | katG_S315T                           | Uzbekistan | Walker, T.M., et al. The Lancet infectious diseases 15.10 (2015): 1193-1202. |
| ERR553023 | rpoB_S450L | kasA_G269S, katG_S315T               | Uzbekistan | Walker, T.M., et al. The Lancet infectious diseases 15.10 (2015): 1193-1202. |
| ERR553051 | rpoB_S450L | katG_S315T                           | Uzbekistan | Walker, T.M., et al. The Lancet infectious diseases 15.10 (2015): 1193-1202. |
| ERR553098 | rpoB_S450L | katG_S315N                           | Uzbekistan | Walker, T.M., et al. The Lancet infectious diseases 15.10 (2015): 1193-1202. |
| ERR553153 | rpoB_S450L | katG_S315T                           | Uzbekistan | Walker, T.M., et al. The Lancet infectious diseases 15.10 (2015): 1193-1202. |
| ERR553163 | rpoB_S450W | katG_S315N                           | Uzbekistan | Walker, T.M., et al. The Lancet infectious diseases 15.10 (2015): 1193-1202. |
| ERR553169 | rpoB_S450L | katG_S315T                           | Uzbekistan | Walker, T.M., et al. The Lancet infectious diseases 15.10 (2015): 1193-1202. |
| ERR553179 | rpoB_S450L | katG_S315T                           | Uzbekistan | Walker, T.M., et al. The Lancet infectious diseases 15.10 (2015): 1193-1202. |
| ERR553180 | rpoB_S450L | katG_S315T                           | Uzbekistan | Walker, T.M., et al. The Lancet infectious diseases 15.10 (2015): 1193-1202. |
| ERR553184 | rpoB_S450L | katG_S315T                           | Uzbekistan | Walker, T.M., et al. The Lancet infectious diseases 15.10 (2015): 1193-1202. |
| ERR553188 | rpoB_S450L | katG_S315T                           | Uzbekistan | Walker, T.M., et al. The Lancet infectious diseases 15.10 (2015): 1193-1202. |
| ERR553192 | rpoB_D435V | katG_S315T                           | Uzbekistan | Walker, T.M., et al. The Lancet infectious diseases 15.10 (2015): 1193-1202. |
| ERR553194 | rpoB_S450L | katG_S315T, fabG1_promoter_T1673432C | Uzbekistan | Walker, T.M., et al. The Lancet infectious diseases 15.10 (2015): 1193-1202. |
| ERR553198 | rpoB_S450L | katG_G297V                           | Uzbekistan | Walker, T.M., et al. The Lancet infectious diseases 15.10 (2015): 1193-1202. |
| ERR553217 | rpoB_S450L | katG_S315T                           | Uzbekistan | Walker, T.M., et al. The Lancet infectious diseases 15.10 (2015): 1193-1202. |
| ERR553246 | rpoB_S450L | katG_S315T                           | Uzbekistan | Walker, T.M., et al. The Lancet infectious diseases 15.10 (2015): 1193-1202. |
| ERR553394 | rpoB_S450L | katG_S315T                           | Uzbekistan | Walker, T.M., et al. The Lancet infectious diseases 15.10 (2015): 1193-1202. |

**Supplementary table 4. Putative compensatory mutations in *rpoA*, *rpoB* and *rpoC* genes identified in this study and in comparison with previous studies**

| Gene | Polymorphism | Hit number | Independent events (NJ) | Independent events (ML) | Comas et al | de Vos et al | Casali et al     | Song et al | Cohen et al |
|------|--------------|------------|-------------------------|-------------------------|-------------|--------------|------------------|------------|-------------|
| rpoA | G31S         | 4          | 3                       | 3                       |             |              | yes <sup>^</sup> |            | yes         |
| rpoA | R182L        | 5          | 2                       | 2                       | yes         |              |                  |            |             |
| rpoA | T181A        | 2          | 2                       | 2                       | yes         |              | yes              |            |             |
| rpoA | T187A        | 23         | 8                       | 8                       | yes*        |              | yes <sup>^</sup> |            | yes         |
| rpoA | T187P        | 3          | 3                       | 3                       | yes*        |              | yes <sup>^</sup> |            |             |
| rpoA | V183G        | 12         | 5                       | 5                       | yes         |              | yes              |            | yes         |
| rpoB | A451V        | 3          | 2                       | 2                       |             |              |                  |            |             |
| rpoB | E481A        | 3          | 2                       | 2                       |             |              |                  |            |             |
| rpoB | E761D        | 216        | 4                       | 6                       |             |              | yes              |            |             |
| rpoB | F503S        | 5          | 2                       | 2                       | yes         |              |                  | yes        |             |
| rpoB | H835R        | 5          | 3                       | 3                       |             |              | yes <sup>^</sup> |            |             |
| rpoB | I488V        | 17         | 2                       | 2                       |             |              | yes              |            |             |
| rpoB | I491V        | 3          | 3                       | 3                       |             |              | yes <sup>^</sup> |            |             |
| rpoB | L731P        | 6          | 3                       | 3                       |             |              | yes              |            |             |
| rpoB | M434V        | 3          | 2                       | 2                       |             |              |                  |            |             |
| rpoB | P45L         | 4          | 2                       | 2                       |             |              |                  |            | yes         |
| rpoB | P45R         | 2          | 2                       | 2                       |             |              |                  |            |             |
| rpoB | P45S         | 5          | 5                       | 5                       |             |              | yes              |            |             |
| rpoB | R219C        | 2          | 2                       | 2                       |             |              |                  |            |             |
| rpoB | R827C        | 9          | 3                       | 3                       | yes         |              |                  |            | yes         |
| rpoB | S874Y        | 2          | 2                       | 2                       |             |              |                  |            |             |
| rpoB | T676P        | 2          | 2                       | 2                       |             |              |                  |            |             |
| rpoC | A521D        | 2          | 2                       | 2                       | yes         |              | yes <sup>^</sup> |            |             |
| rpoC | D485N        | 24         | 6                       | 6                       | yes*        |              | yes <sup>^</sup> |            |             |
| rpoC | D485Y        | 5          | 4                       | 4                       | yes         |              | yes <sup>^</sup> |            |             |
| rpoC | D747A        | 6          | 2                       | 2                       |             |              | yes              |            |             |
| rpoC | E1033K       | 2          | 2                       | 2                       |             |              |                  |            |             |
| rpoC | E750Q        | 5          | 2                       | 2                       |             |              |                  |            |             |
| rpoC | F452C        | 2          | 2                       | 2                       | yes         |              | yes              |            |             |
| rpoC | G332C        | 2          | 2                       | 2                       |             |              | yes <sup>^</sup> |            |             |
| rpoC | G332R        | 9          | 6                       | 6                       | yes         |              | yes <sup>^</sup> |            |             |
| rpoC | G332S        | 2          | 2                       | 2                       | yes         |              | yes <sup>^</sup> |            | yes         |
| rpoC | G433S        | 6          | 5                       | 5                       | yes         |              | yes <sup>^</sup> |            |             |
| rpoC | G519D        | 4          | 4                       | 4                       | yes         |              | yes <sup>^</sup> |            |             |
| rpoC | G519R        | 2          | 2                       | 2                       |             |              |                  |            |             |
| rpoC | H525Q        | 7          | 4                       | 4                       | yes         | yes          |                  |            | yes         |
| rpoC | I491V        | 22         | 14                      | 13                      | yes*        | yes#         |                  |            | yes         |
| rpoC | I885V        | 6          | 3                       | 3                       | yes         |              |                  |            | yes         |
| rpoC | K445R        | 21         | 6                       | 6                       |             |              | yes <sup>^</sup> |            |             |
| rpoC | L449V        | 12         | 5                       | 5                       | yes         |              | yes <sup>^</sup> |            |             |
| rpoC | L516P        | 7          | 5                       | 5                       | yes         |              | yes              |            |             |
| rpoC | L527V        | 19         | 4                       | 4                       | yes         |              | yes <sup>^</sup> |            |             |
| rpoC | N416S        | 3          | 3                       | 3                       | yes         |              |                  | yes        |             |
| rpoC | N698H        | 5          | 3                       | 3                       | yes*        | yes          |                  |            |             |
| rpoC | N698K        | 5          | 4                       | 4                       | yes*        |              |                  |            | yes         |
| rpoC | N698S        | 80         | 7                       | 7                       | yes*        | yes          |                  |            |             |
| rpoC | N826K        | 3          | 2                       | 2                       | yes         |              |                  |            | yes         |
| rpoC | P1040R       | 4          | 4                       | 4                       | yes         | yes          |                  |            | yes         |
| rpoC | P1040S       | 28         | 8                       | 8                       | yes         |              |                  |            | yes         |
| rpoC | P434Q        | 3          | 3                       | 3                       |             |              | yes <sup>^</sup> |            |             |
| rpoC | P434R        | 4          | 2                       | 2                       | yes*        |              | yes <sup>^</sup> |            |             |
| rpoC | Q1125H       | 2          | 2                       | 2                       | yes         |              |                  |            | yes         |
| rpoC | R459W        | 2          | 2                       | 2                       |             |              |                  |            | yes         |
| rpoC | T825A        | 2          | 2                       | 2                       |             |              |                  |            |             |
| rpoC | V1252L       | 15         | 5                       | 5                       | yes         | yes#         |                  |            | yes         |
| rpoC | V431M        | 9          | 5                       | 5                       |             |              | yes <sup>^</sup> |            |             |
| rpoC | V483A        | 22         | 13                      | 13                      | yes*        | yes          | yes <sup>^</sup> |            |             |

|      |       |    |    |    |      |      |      |     |     |
|------|-------|----|----|----|------|------|------|-----|-----|
| rpoC | V483G | 55 | 26 | 26 | yes* | yes# | yes^ | yes | yes |
| rpoC | V517L | 3  | 2  | 2  | yes  |      | yes^ |     |     |
| rpoC | W484G | 13 | 9  | 9  | yes  |      | yes^ |     |     |

\*: these mutations have effect on protein function using SIFT scores and competitive experiment

#: these mutations evolved independently in phylogenetically distant strain families as defined by spoligotyping

^: these mutations emerged independently multiple times in isolates with RRDR mutations

**Supplementary Table 5. Comparison of ratios of compensatory mutations in clustered and non-clustered MDR-TB strains without excluding M type clusters.**

| Groups               | Total | With CMs   | Without CMs | $\chi^2$ | P value |
|----------------------|-------|------------|-------------|----------|---------|
| Clustered MDR-TB     | 94    | 42 (44.7%) | 52 (55.3%)  | 4.557    | 0.033   |
| Non-clustered MDR-TB | 133   | 41 (30.8%) | 92 (69.2%)  |          |         |

CMs: Compensatory mutations
